# Supplementary material for: The application of design of experiments (DoE) reaction optimisation and solvent selection in the development of new synthetic chemistry
Source: Royal Society of Chemistry journal article supplement (doi:10.1039/c5ob01892g), 2015-12-24
Supplement: c5ob01892g1.xlsx [file c5ob01892g1.xlsx]

## Sheet: General Solvent PCA Data
Number	Solvent	Abbreviation/Formula	CAS	PC1	PC2	PC3	PC4
1	1,1,3,3-tetramethylurea	Me2NCONMe2	632-22-4	-1.29549	1.78516	-1.64527	1.02808
2	1,2-dichloroethane	DCE	107-06-2	0.790598	1.09577	1.33613	-2.62882
3	1,2-dimethoxyethane	DME	110-71-4	1.46918	-1.82859	-0.913876	-0.462893
4	1,3-dimethylimidazolidin-2-one		80-73-9	-2.30473	2.88555	-1.34349	0.741527
5	1,3-propanediol		504-63-2	-5.85413	-0.715773	1.23569	1.38653
6	1,4-dioxane	Dioxan	123-91-1	0.55908	-0.198631	0.0749779	-1.43489
7	1-butanol	n-BuOH	71-36-3	-2.06548	-2.48812	-0.441333	1.34937
8	1-ethyl-2-pyrrolidinone		2687-91-4	-1.50532	2.87673	-1.37898	0.756128
9	1-methylimidazole		616-47-7	-3.62174	2.56365	-1.08642	-0.2124
10	2,2,2-trifluoroethanol	CF3CH2OH	75-89-8	-2.96923	-3.07478	4.59894	0.116793
11	2,6-dimethylpyridine	2,6-Lutidine	108-48-5	0.295862	1.63885	-1.87303	0.70546
12	2-aminoethanol	H2NCH2CH2OH	141-43-5	-5.09506	-0.467727	0.439455	0.640984
13	2-butanol	s-BuOH	78-92-2	-1.23508	-2.75159	-1.4114	1.06865
14	2-butyl acetate	s-BuOAc	105-46-4	2.13388	-1.13363	-0.0652464	1.10618
15	2-ethyl-1-butanol		97-95-0	0.544794	-0.527734	-0.516545	1.317
16	2-methyl-1-butanol		137-32-6	-1.2342	-1.92747	-1.06792	1.8728
17	2-methyl-1-pentanol		105-30-6	-0.937814	-1.50001	-1.16678	2.49623
18	2-methylbutan-2-ol		75-85-4	-0.524639	-1.57493	-1.83824	1.63846
19	2-methylpropan-1-ol		78-83-1	-1.5145	-3.00052	-1.09997	1.32163
20	2-methylpropan-2-ol	tBuOH	75-65-0	-1.40802	-2.19729	-1.47913	1.30239
21	2-methyltetrahydrofuran	2-Me-THF	96-47-9	1.72707	-1.31552	-0.907285	-1.10227
22	2-pentanone	MeCOPr	107-87-9	-0.0794929	-0.428763	-1.23595	-0.485171
23	2-propanol	i-PrOH	67-63-0	-2.01907	-3.29609	-1.03528	0.827805
24	3,3-dimethyl-2-butanone		75-97-8	0.538176	-0.158773	-1.69767	0.52316
25	3-methyl-3-pentanol		77-74-7	-0.157241	-1.02485	-1.43504	2.05036
26	3-pentanol		584-02-1	-0.939925	-1.91151	-1.46842	1.67193
27	3-pentanone	EtCOEt	96-22-0	0.416783	-0.377442	-0.983186	-0.558702
28	4-formylmorpholine		4394-85-8	-4.83753	3.36734	-0.062126	0.439215
29	4-methyl-2-pentanol		108-11-2	-0.343572	-1.84126	-1.23478	2.41011
30	4-methyltetrahydropyran		4717-96-8	0.802125	-0.68949	-0.243584	0.0630152
31	acetic acid	AcOH	64-19-7	-2.83318	-2.4222	2.08178	0.232748
32	acetic anhydride	Ac2O	108-24-7	-0.972937	0.442237	0.277486	-1.02003
33	acetone	MeCOMe	67-64-1	-0.552965	-1.91748	-1.04346	-1.69659
34	acetonitrile	MeCN	75-05-8	-2.18069	-1.48531	-0.247267	-2.24492
35	acetophenone	PhCOMe	98-86-2	-0.691029	4.0325	-0.392827	-0.0348959
36	anisole	PhOMe	100-66-3	1.02308	1.87828	0.0216225	-0.739894
37	benzene	PhH	71-43-2	2.19981	1.03297	0.45772	-2.61091
38	benzonitrile	PhCN	100-47-0	-0.865475	3.42996	-0.226591	-0.704955
39	benzotrifluoride	PhCF3	98-08-8	1.65295	1.83486	1.54868	-0.573042
40	benzyl alcohol	PhCH2OH	100-51-6	-2.08676	1.845	0.567267	0.829219
41	butanenitrile	PrCN	109-74-0	-0.454701	-0.720198	-0.962335	-1.24958
42	butyl acetate	n-BuOAc	123-86-4	1.63311	-0.30867	-0.602951	0.315454
43	butyl butyrate	n-BuO2CPr	109-21-7	3.07295	0.360229	0.105183	1.98061
44	carbon disulfide	CS2	75-15-0	2.2203	2.20643	1.13606	-2.80916
45	carbon tetrachloride	CCl4	56-23-5	3.10631	1.37746	2.75952	-1.93041
46	chlorobenzene	PhCl	108-90-7	1.49907	2.55567	0.643688	-1.80545
47	chloroform	CHCl3	67-66-3	1.34739	0.516803	2.12692	-2.06386
48	cis-decalin		493-01-6	4.04154	2.12564	0.887184	-0.421803
49	cyclohexane	CyH	110-82-7	3.95921	-0.419165	1.05746	-1.94216
50	cyclopentyl methyl ether	CPME	5614-37-9	3.35818	-0.633335	0.640075	-1.70574
51	decane	n-C10H22	124-18-5	5.3948	0.957371	1.07178	0.639792
52	dichloromethane	CH2Cl2	75-09-2	0.544955	-0.422226	1.45303	-2.76417
53	diethyl ether	Et2O	60-29-7	2.43434	-3.14215	-1.37615	-0.779212
54	diethylamine	Et2NH	109-89-7	1.10713	-2.48554	-2.43252	0.463709
55	diethylcarbonate	EtOCO2Et	105-58-8	1.80216	-0.191675	0.143425	-0.102624
56	dimethyl carbonate	DMC	616-38-6	0.760087	-1.30966	0.303787	-0.702277
57	Dimethyl isosorbide		5306-85-4	-0.779892	2.32896	0.0331569	2.39333
58	dimethylsulfoxide	DMSO	67-68-5	-4.46451	2.38703	-1.22438	-0.929566
59	di-n-butylether	Bu2O	142-96-1	3.35797	-0.572034	-0.953888	1.39431
60	di-n-propylether	Pr2O	111-43-3	2.71016	-1.77843	-1.21514	0.182084
61	dipentene		138-86-3	3.85985	1.64497	-1.2536	1.0524
62	dipentyl ether		693-65-2	3.93542	1.10418	-0.771283	2.32808
63	dipropylene glycol dimethyl ether (mixture)		111109-77-4	2.22369	1.0575	-0.275616	2.77445
64	di-tert-butyl ketone	t-BuCO-t-Bu	815-24-7	1.81151	1.188	-2.2443	2.36019
65	ethanol	EtOH	64-17-5	-2.84452	-3.95306	-0.282672	0.140398
66	ethyl acetate	EtOAc	141-78-6	1.01348	-1.43156	-0.80917	-0.740837
67	ethyl amyl ketone		106-68-3	1.21835	1.14146	-1.99482	1.94809
68	ethyl butanoate	EtOCOPr	105-54-4	1.70054	-0.502492	-0.565103	0.118609
69	ethyl butyl ketone	EtCOBu	106-35-4	0.974324	0.529559	-1.84173	1.21951
70	ethyl formate	EtO2CH	109-94-4	-0.329657	-1.48624	-0.518989	-1.57999
71	ethyl n-butyl ether	EtOBu	628-81-9	2.56736	-1.68408	-1.13349	0.131836
72	ethylene carbonate		96-49-1	-4.50617	3.26324	0.935634	-1.78506
73	ethylene glycol	HOCH2CH2OH	107-21-1	-5.63545	-1.00549	2.32273	0.288423
74	ethylphenyl ether	PhOEt	103-73-1	1.76345	2.40214	0.0560864	-0.421797
75	fluorobenzene	PhF	462-06-6	1.56839	1.29287	0.759582	-2.27403
76	formamide	HCONH2	75-12-7	-7.78931	0.530891	1.64091	-1.40182
77	formic acid	HCO2H	64-18-6	-5.73361	-2.52661	4.0884	-0.522261
78	glycerol		56-81-5	-6.74601	1.70395	3.26667	1.28012
79	glycerol carbonate		931-40-8	-7.2142	2.96053	0.613785	2.10122
80	glycerol-1,3-dimethyl ether		623-69-8	-1.73789	-0.0821899	0.578058	2.09831
81	glycerol-1-monobutylether		624-52-2	-2.67859	1.61386	1.05815	4.06646
82	glycerol-1-monomethylether		623-39-2	-4.18387	0.49944	1.03531	2.08101
83	heptane	n-C7H16	142-82-5	5.20964	-1.43012	0.633922	-1.05638
84	hexafluorobenzene	C6F6	392-56-3	4.19441	1.41038	4.88474	0.256735
85	hexamethylphosphoramide	HMPA	680-31-9	-1.26587	3.52049	-2.08282	3.02578
86	hexane	n-C6H14	110-54-3	5.10931	-2.21424	0.604155	-1.55103
87	isobutyl acetate	i-BuOAc	110-19-0	2.35751	-1.05851	-0.17439	0.957383
88	isopentyl acetate		123-92-2	1.96793	-0.0823158	-0.380525	0.80927
89	isopropyl acetate	i-PrOAc	108-21-4	1.29051	-1.28254	-0.48151	-0.255272
90	lactic acid, ethyl ester		97-64-3	-1.8386	-0.404774	0.41228	2.2443
91	mesitylene		108-67-8	3.38991	1.83759	0.27722	-0.500156
92	methanesulfonic acid	MsOH	75-75-2	-7.82218	1.52729	2.7083	0.055717
93	methanol	MeOH	67-56-1	-4.10648	-4.89092	0.651199	-0.305101
94	methyl acetate	MeOAc	79-20-9	0.595777	-2.0205	-0.667961	-1.35945
95	methyl amyl acetate		108-84-9	3.06064	0.739433	-0.236128	1.60885
96	methyl ethyl ketone	MeCOEt	78-93-3	-0.109517	-1.14461	-1.18802	-1.1745
97	methyl formate	HCO2Me	107-31-3	-0.514511	-2.49657	-0.00131351	-1.92678
98	methyl isoamyl ketone		110-12-3	2.19719	-0.0449149	-0.476518	0.772094
99	methyl isobutyl ketone	MeCOiBu	108-10-1	0.877103	-0.42764	-1.55565	0.352257
100	methyl isobutyrate	MeO2CiBu	547-63-7	1.29636	-0.952648	-0.481818	-0.557581
101	methylcyclohexane	CyMe	108-87-2	4.171	-1.05179	0.452338	-1.28438
102	methyl-t-butyl ether	t-BuOMe/TBME	1634-04-4	2.34955	-2.43022	-1.0516	-0.348263
103	m-xylene		108-38-3	2.84263	1.33331	0.375632	-1.10023
104	N,N´-dimethylpropyleneurea	DMPU	7226-23-5	-1.65319	3.02257	-1.75251	1.45781
105	N,N-dimethylacetamide	DMA	127-19-5	-2.33265	1.0778	-1.6037	-0.00195391
106	N,N-dimethylformamide	DMF	68-12-2	-2.67998	0.527336	-1.58183	-0.775239
107	n-butyl methyl ether	BuOMe	628-28-4	2.23931	-2.23767	-0.952389	-0.436227
108	n-butylpyrrolidinone		3470-98-2	-1.10238	3.23196	-0.267909	2.0464
109	nitrobenzene	PhNO2	98-95-3	-1.46601	4.99371	0.611776	-1.16483
110	nitromethane	MeNO2	75-52-5	-2.71732	0.0860562	1.42703	-2.80464
111	N-methylformamide		123-39-7	-5.5118	-0.0278775	-0.0833732	-0.110683
112	N-methylpyrrolidine-2-one	NMP	872-50-4	-2.31534	2.62013	-1.50639	0.00318977
113	n-propyl acetate	PrOAc	109-60-4	1.34289	-0.957933	-0.476048	-0.225239
114	o-xylene		95-47-6	2.53581	1.6806	0.433289	-1.07394
115	pentane	n-C5H12	109-66-0	4.97576	-3.20788	0.467571	-1.83959
116	pentanol	n-C5H11OH	71-41-0	-1.2698	-1.85209	-0.678087	1.87668
117	perfluoromethylcyclohexane		355-02-2	7.17429	0.623132	8.43104	5.31511
118	propanol	PrOH	71-23-8	-2.27521	-3.31242	-0.679569	0.924193
119	propionitrile	EtCN	107-12-0	-1.14806	-1.10032	-0.770954	-1.78471
120	propylene carbonate		108-32-7	-2.94718	3.11981	0.507077	-1.42899
121	p-xylene		106-42-3	2.98249	1.25012	0.383424	-1.10251
122	pyridine	Py	110-86-1	-1.24904	1.60565	-1.7486	-1.01476
123	pyrrolidine		123-75-1	-0.147788	0.188101	-2.73845	-0.481194
124	quinoline		91-22-5	-0.409395	4.85769	-1.36994	0.726183
125	sulfolane		126-33-0	-3.54162	3.96596	0.364519	-0.589441
126	tert-butyl acetate	t-BuOAc	540-88-5	1.8855	-0.92182	0.144964	0.645533
127	tetradecafluorohexane		355-42-0	7.9965	0.824361	7.55773	4.99636
128	tetrahydrofuran	THF	109-99-9	0.424405	-1.34983	-1.44861	-1.35114
129	tetrahydropyran	THP	142-68-7	0.986951	-0.673472	-1.09909	-0.721808
130	tetralin		119-64-2	2.70482	3.46555	0.489281	-0.529591
131	toluene	PhMe	108-88-3	2.817	0.646821	0.38959	-1.91268
132	triethylamine	Et3N	121-44-8	2.72108	-1.42337	-3.08078	1.34075
133	trifluoroacetic acid	TFA	76-05-1	-2.75371	-2.76145	5.71855	0.847278
134	trimethyl orthoformate	(MeO)3CH	149-73-5	0.840508	-0.484738	-0.515157	-0.392756
135	tripropylamine	Pr3N	102-69-2	3.38565	0.490035	-2.45089	3.00247
136	water	H2O	7732-18-5	-9.22003	-3.67193	4.60824	-1.27075
