# Supplementary material for: The application of design of experiments (DoE) reaction optimisation and solvent selection in the development of new synthetic chemistry
Source: Royal Society of Chemistry journal article supplement (doi:10.1039/c5ob01892g), 2015-12-24
Supplement: c5ob01892g2.pdf [file c5ob01892g2.pdf]

# Design of Experiments (DoE) Reaction Optimisation and Solvent Selection: A Guide for Academic Chemists

Paul M. Murray,<sup>a\*</sup> Fiona Bellany,<sup>b</sup> Laure Benhamou,<sup>b</sup> Dejan-Krešimir Bučar,<sup>b</sup> Alethea B  
Tabor<sup>b</sup> and Tom D. Sheppard<sup>b\*</sup>

<sup>a</sup>*Paul Murray Catalysis Consulting Ltd, 67 Hudson Close, Yate, BS37 4NP, UK*

<sup>b</sup>*Department of Chemistry, University College London,  
Christopher Ingold Laboratories, 20 Gordon St, London, WC1H 0AJ, UK*

[paul.murray@catalysisconsulting.co.uk](mailto:paul.murray@catalysisconsulting.co.uk)

[tom.sheppard@ucl.ac.uk](mailto:tom.sheppard@ucl.ac.uk)

## Table of Contents

|                                                                                     |    |
|-------------------------------------------------------------------------------------|----|
| 1. Experimental Procedures, Data and Spectra for Solvent Substitution Reactions     | 2  |
| 2. Experimental Procedures, Data and Spectra for S <sub>N</sub> Ar products         | 6  |
| 3. DoE Optimisation of S <sub>N</sub> Ar reaction                                   | 14 |
| 4. Crystallographic Data for S <sub>N</sub> Ar byproducts <b>13b</b> and <b>13c</b> | 24 |
| 5. References                                                                       | 25 |

## 1. Experimental Procedures, Data and Spectra for Solvent Substitution Reactions

### Experimental procedures

#### Gold catalysed synthesis of boron enolate from alkynes<sup>1</sup>

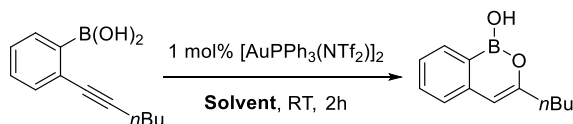

| Entry | Solvent                            | Yields (%) |
|-------|------------------------------------|------------|
| 1     | $\text{CH}_2\text{Cl}_2$           | 80         |
| 2     | $\text{MeO}_2\text{CO}_2\text{Me}$ | 84         |

**General procedure:**  $[\text{Au}(\text{PPh}_3)(\text{NTf}_2)]_2 \cdot \text{PhMe}$  (8 mg, 0.005 mmol) was added to a solution of 2-(hex-1-ynyl)phenylboronic acid (100 mg, 0.5 mmol) in the solvent (0.6 mL). The solution was stirred at room temperature for 3 hours. The mixture was then directly loaded onto a column and purified via chromatography on silica gel using Petrol/EtOAc (100/0 to 80/20) as eluent. Evaporation of the solvent afforded a mixture of monomeric and dimeric boron enolate product (ratio 0.6/1) as a colourless oil;  $^1\text{H}$  NMR ( $\text{CDCl}_3$ , 500 MHz, monomer)  $\delta$  = 7.98 (d, 1H,  $J$  = 7.4 Hz,  $\text{CH}_{\text{Ar}}$ ), 7.60 (td, 1H,  $J$  = 7.7, 1.4 Hz,  $\text{CH}_{\text{Ar}}$ ), 7.35-7.31 (m, 2H,  $\text{CH}_{\text{Ar}}$ ), 6.13 (s, 1H,  $=\text{CH}$ ), 4.63 (br, 1H,  $\text{BOH}$ ), 2.49 (t, 2H,  $J$  = 7.4 Hz,  $\text{CH}_2(\text{CH}_2\text{CH}_2\text{CH}_3)$ ), 1.71 (q, 2H,  $J$  = 7.7 Hz,  $\text{CH}_2(\text{CH}_2\text{CH}_3)$ ), 1.44 (sext, 2H,  $J$  = 7.6 Hz,  $\text{CH}_2\text{CH}_3$ ) 0.99 (t, 3H,  $J$  = 7.4 Hz,  $\text{CH}_3$ );  $^{13}\text{C}$  NMR ( $\text{CDCl}_3$ , 500 MHz)  $\delta$  = 155.2, 143.3, 132.5, 132.3, 125.4, 124.9, 105.5, 34.7, 29.4, 22.3, 13.9, the carbon adjacent to boron was not observed. These data are in agreement with the data reported in the literature.<sup>1</sup>

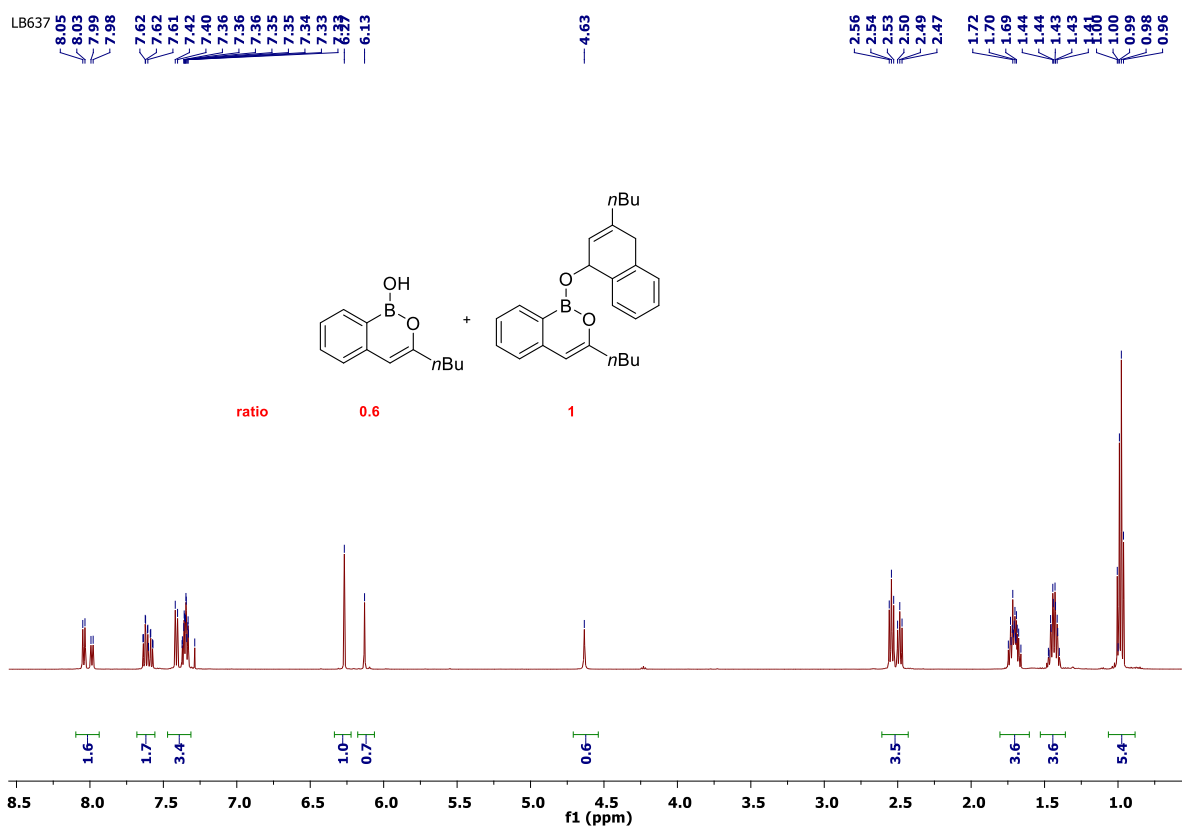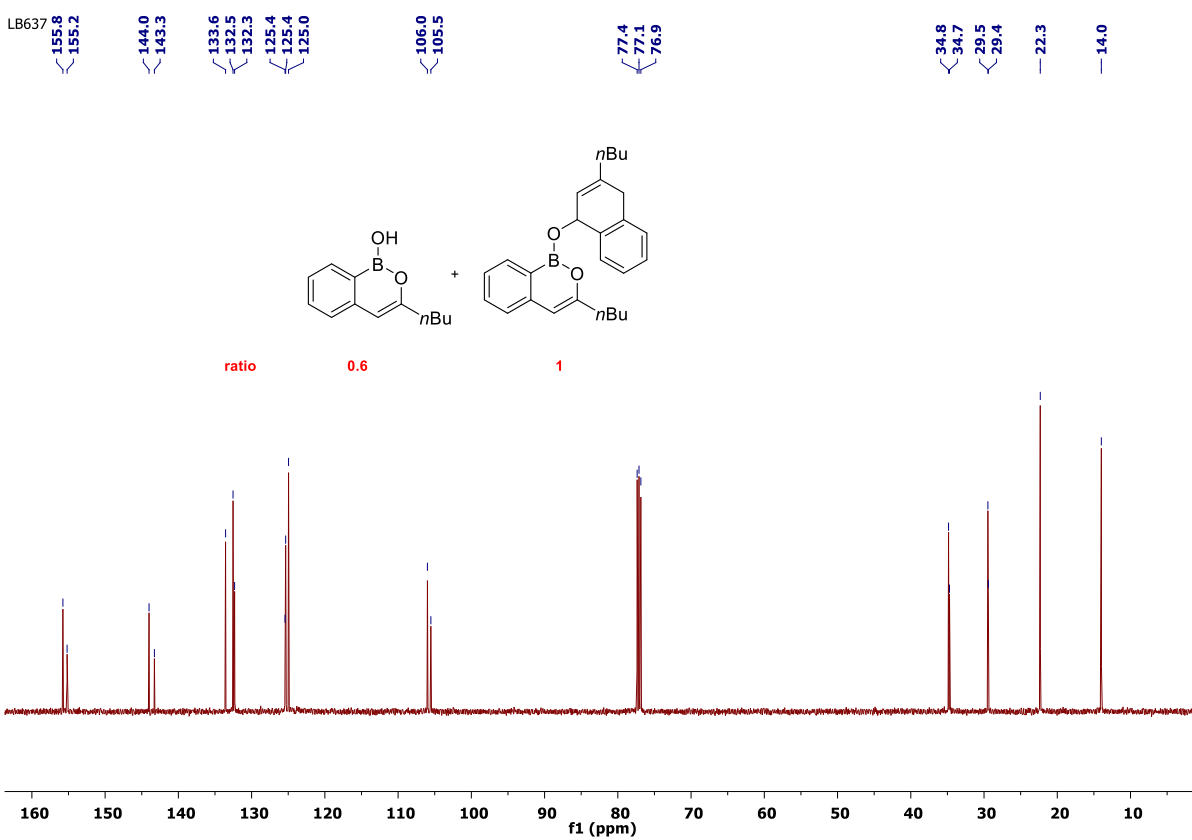

## Gold catalysed hydroamination of 1,3-dienes<sup>2</sup>

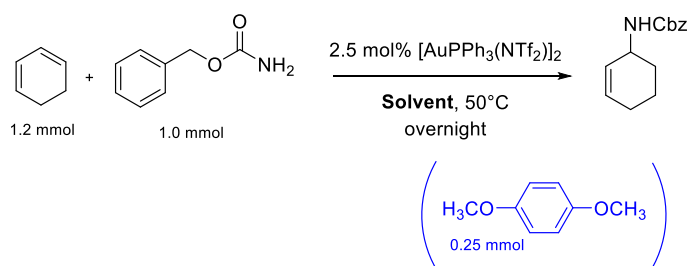

| Entry | Solvent                             | Yields (%) |
|-------|-------------------------------------|------------|
| A     | $\text{ClCH}_2\text{CH}_2\text{Cl}$ | 65         |
| B     | PhF                                 | 85         |
| C     | $\text{PhCF}_3$                     | 65         |

**General procedure:**  $[\text{Au}(\text{PPh}_3)(\text{NTf}_2)]_2 \cdot \text{PhMe}$  (40 mg, 0.025 mmol) and benzyl carbamate (150 mg, 1.0 mmol) were placed in a Schlenk tube and degassed (3 x vac/Ar cycles) before addition of the solvent (2 mL) and 1,3-cyclohexadiene (120  $\mu\text{L}$ , 1.2 mmol). The resulting mixture was stirred overnight at 50 °C under exclusion of light. The volatiles were removed under vacuum and the crude residue was purified by column chromatography on silica using PEth/EtOAc (100/0 to 80/20). Evaporation of the solvent revealed a mixture of desired product along with 1,3-cyclohexadiene. The yield of hydroamination product was evaluated by  $^1\text{H}$  NMR using 1,4-dimethoxybenzene (0.25 mmol, 35 mg) as an internal standard. The signals used to quantify the product were the aromatic signal of the internal standard (6.84 ppm, s) and the  $-\text{CH}_2$  signal of the benzyl group in the product (5.12 ppm, s).

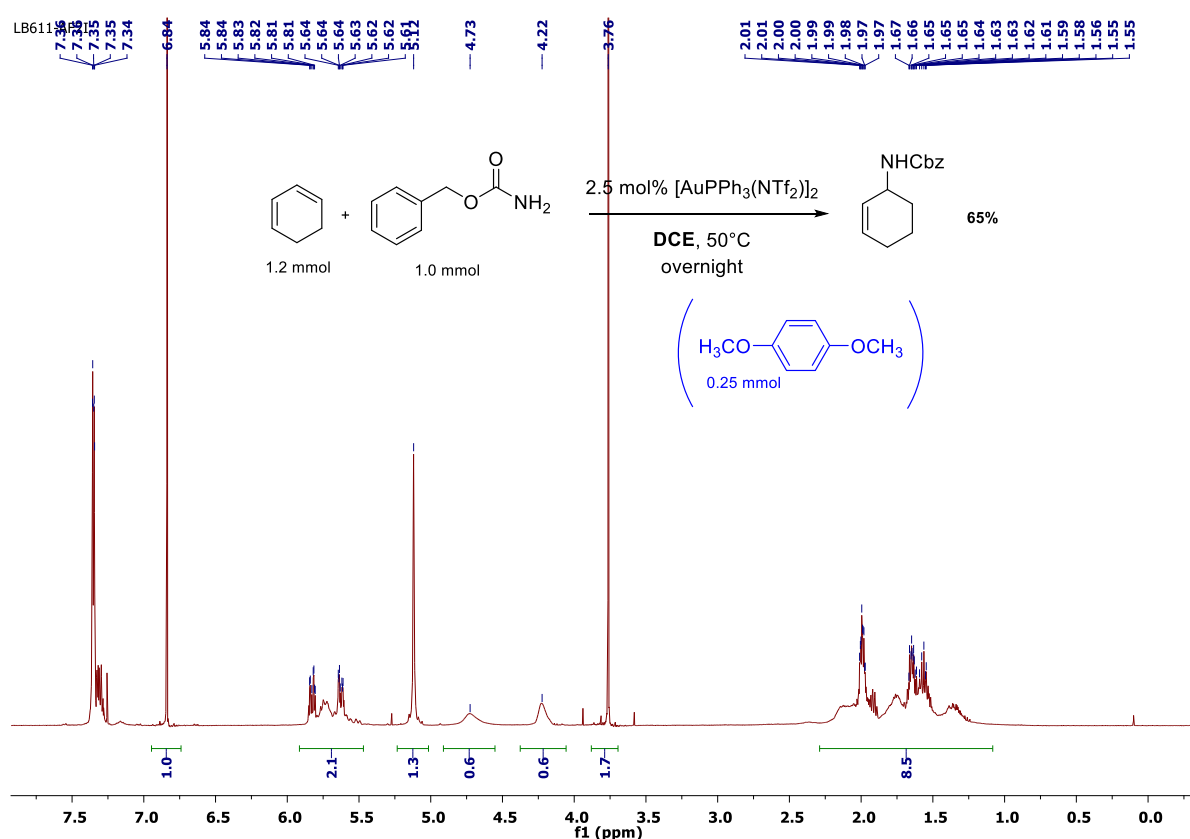

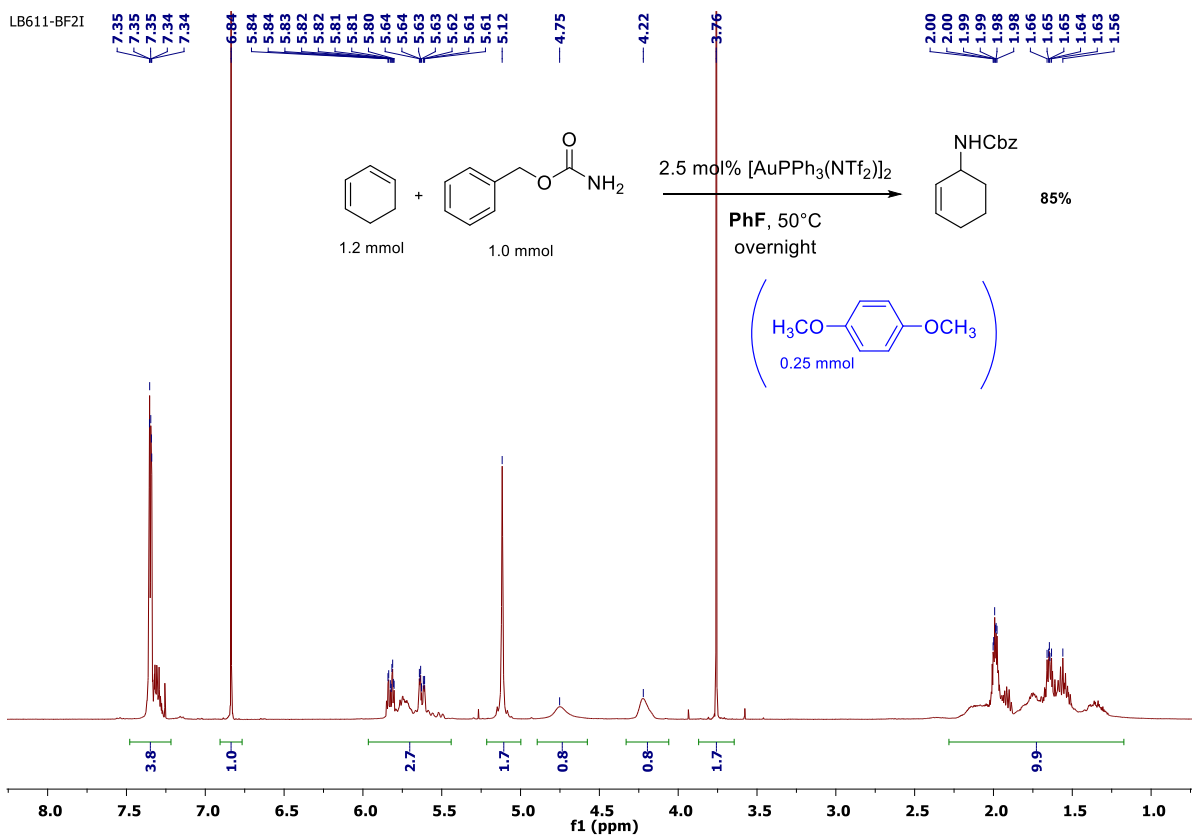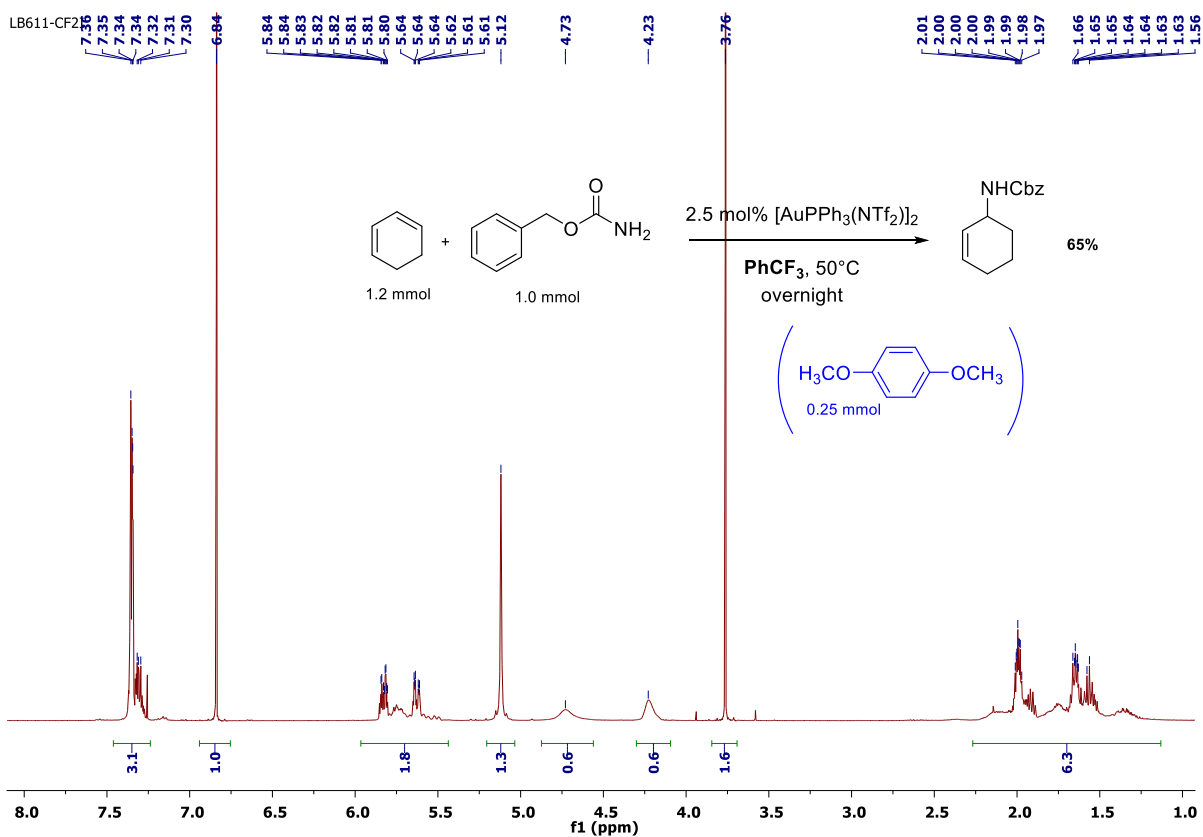

## 2. Experimental Procedures, Data and Spectra for SNAr products

### Material and Methods

3-Amino-5-methylpyrazole was purchased from Alfa Aesar. All other reagents were purchased from Sigma-Aldrich Co. Ltd. unless otherwise stated, and used without further purification. All reagents were of commercial quality and used as received.

Microwave reactions were performed on a Personal Chemistry Smith Creator Microwave Assisted Organic Synthesizer.

Thin layer chromatography (TLC) was performed on aluminium backed Sigma-Aldrich TLC plates with F<sub>254</sub> fluorescent indicator. Developed plates were air dried and analysed under a UV light or by staining with the appropriate indicator. Normal phase flash column chromatography was carried out using silica gel (43-60  $\mu\text{m}$ ) supplied by Merck.

HRMS refers to high resolution mass spectrometry. Electrospray ionization (ESI) accurate mass was determined using Waters LCT Premier XE instrumentation. Infrared spectra were recorded using a Perkin Elmer 100 FT-IR spectrometer and adsorption maxima are reported in wavenumbers ( $\text{cm}^{-1}$ ). Melting points were recorded on a Gallenkamp Hot Stage apparatus and are uncorrected.

NMR ( $^1\text{H}$  and  $^{13}\text{C}$ ) was performed on a 600 MHz AMX Bruker Spectrometer. The chemical shifts ( $\delta$ ) are given in units of ppm relative to tetramethylsilane (TMS), where  $\delta(\text{TMS}) = 0$  ppm. Data processing was carried out using the TOPSPIN 2 NMR program (Bruker UK Ltd). For  $^1\text{H}$  NMR, the multiplicity used for assignment is indicated by the following abbreviations: s = singlet, d = doublet, m = multiplet, br = broad and the coupling constants ( $J$ ) were measured in Hertz (Hz).  $^{13}\text{C}$  NMR have been assigned using DEPT, HSQC and HMBC NMR as performed on 600 MHz AMX Bruker Spectrometers. Deuterated chloroform ( $\text{CDCl}_3$ ), dimethylsulfoxide ( $\text{d}_6\text{-DMSO}$ ) and methanol ( $\text{CD}_3\text{OD}$ ) were used as solvents (as stated) for all NMR analysis.

### 2-(Methylthio)pyrimidin-4-ol<sup>3</sup>

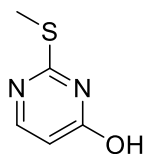

2-Thiouracil (10.00 g, 78.0 mmol) was added to a solution of sodium hydroxide (6.24 g, 156 mmol) in H<sub>2</sub>O (0.7 mL per mmol). The reaction was cooled to 0 °C in an ice bath before methyl iodide (7.30 mL, 117 mmol) was added dropwise and the reaction stirred at RT for 16 h. The reaction mixture was cooled in an ice bath before acidifying with glacial acetic acid. A precipitate appeared which was filtered, washed with H<sub>2</sub>O and dried to give the phenol (8.32 g, 75%) as an off-white solid; *R*<sub>f</sub> 0.45 (5% MeOH/CH<sub>2</sub>Cl<sub>2</sub>); mp 162 - 164 °C (lit. 99 - 101 °C<sup>3</sup>); <sup>1</sup>H NMR (600 MHz, *d*<sub>6</sub>-DMSO) δ 12.68 (1H, br, OH), 7.86 (1H, d, *J* = 4.0 Hz, H6), 6.09 (1H, d, *J* = 4.0 Hz, H5) and 2.47 (3H, s, CH<sub>3</sub>); <sup>13</sup>C NMR (150 MHz, *d*<sub>6</sub> - DMSO) δ 163.4 (C2), 162.9 (C4), 153.7 (C6), 109.9 (C5) and 12.9 (CH<sub>3</sub>); LRMS (ES+) 142.9 [M+H]<sup>+</sup>. The data is in good agreement with the literature values.<sup>3</sup>

### 4-Chloro-2-(methylthio)pyrimidine (11)

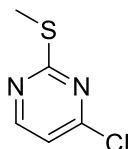

2-(Methylthio)pyrimidin-4-ol (7.00 g, 49.3 mmol) was added to POCl<sub>3</sub> (0.6 mL per mmol) under argon and the mixture heated at 80 °C for 5 h. The reaction was cooled to RT and quenched by carefully adding to warm H<sub>2</sub>O (500 mL) before being extracted with CH<sub>2</sub>Cl<sub>2</sub> (3 × 500 mL). The organic layer was washed with 10% K<sub>2</sub>CO<sub>3</sub> solution (750 mL), dried (MgSO<sub>4</sub>) and concentrated *in vacuo* to give **11** (5.70 g, 70%) as a colourless oil; *R*<sub>f</sub> 0.71 (5% MeOH/CH<sub>2</sub>Cl<sub>2</sub>); <sup>1</sup>H NMR (600 MHz, CDCl<sub>3</sub>) δ 8.37 (1H, d, *J* = 5.1 Hz, H6), 6.99 (1H, d, *J* = 5.1 Hz, H5) and 2.55 (3H, s, CH<sub>3</sub>); <sup>13</sup>C NMR (150 MHz, CDCl<sub>3</sub>) δ 174.1 (C2), 161.1 (C4), 158.1 (C6), 116.5 (C5) and 14.4 (CH<sub>3</sub>); LRMS (ES+) 160.9 [M+H]<sup>+</sup>. The data is in good agreement with the literature values.<sup>4</sup>

### *N*-(3-Methyl-1H-pyrazol-5-yl)-2-(methylthio)pyrimidin-4-amine (13a)

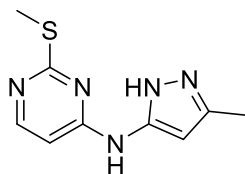

#### Method 1 (thermal reaction before optimisation):<sup>4</sup>

*N,N*-Diisopropylethylamine (DIPEA) (5.23 mL, 30.0 mmol) and sodium iodide (4.50 g, 30.0 mmol) were added to a solution of aryl chloride **11** (4.00 g, 25.0 mmol) and 3-amino-5-methylpyrazole **12** (2.45 g, 25.0 mmol) in DMF (3 mL per mmol). The reaction was heated at 85 °C for 89 h. The

reaction mixture was cooled to RT before diluting with EtOAc (250 mL) and washing with H<sub>2</sub>O (3 × 250 mL). The combined aqueous layers were extracted with EtOAc (2 × 250 mL). The combined organic layers were dried (MgSO<sub>4</sub>), filtered and concentrated *in vacuo*. Purification by flash column chromatography (10 – 75% EtOAc/Pet. Ether) gave **13a** (995 mg, 18% yield) as an off-white solid.

Method 2 (microwave conditions before optimisation):

A mixture of aryl chloride **11** (100 mg, 0.63 mmol), 3-amino-5-methylpyrazole **12** (61.7 mg, 0.63 mmol), DIPEA (132 µL, 0.76 mmol) and sodium iodide (114 mg, 0.76 mmol) in DMF (3 mL per mmol) was heated in a microwave at 180 °C for 2 h. The reaction mixture was cooled to RT before diluting with EtOAc (10 mL) and washing with H<sub>2</sub>O (3 × 10 mL). The combined aqueous layers were extracted with EtOAc (2 × 10 mL). The combined organic layers were dried (MgSO<sub>4</sub>), filtered and concentrated *in vacuo*. Purification by flash column chromatography (10 – 75% EtOAc/Pet. Ether) gave **13a** (26.6 mg, 19% yield) as an off-white solid.

Method 3 (microwave conditions after optimisation):

A solution of aryl chloride **11** (400 mg, 2.50 mmol) and 3-amino-5-methylpyrazole **12** (485 mg, 5.00 mmol) in dipropyl ether (5 mL) was heated in a microwave at 140 °C for 2 h. The reaction mixture was concentrated *in vacuo*. Purification by flash column chromatography (10 – 75% EtOAc/Pet. Ether) gave **13a** (314 mg, 57%) as an off-white solid.

R<sub>f</sub> 0.25 (80% EtOAc/Pet. Ether); mp 207 – 210 °C; IR ν<sub>max</sub> (solid) 3280 (NH), 3160 (NH), 3100 – 2920 (CH) cm<sup>-1</sup>; <sup>1</sup>H NMR (600 MHz, CD<sub>3</sub>OD) δ 7.98 (1H, d, *J* = 5.6 Hz, H6); 6.69 (1H, br, H5), 6.23 (1H, br, H13), 2.52 (3H, s, H8) and 2.28 (3H, s, H15); <sup>13</sup>C NMR (150 MHz, CD<sub>3</sub>OD) δ 172.9 (C2), 161.4 (C4), 156.1 (C6), 149.4 (Pyrazole C3), 141.3 (Pyrazole C5), 102.4 (C5), 97.7 (Pyrazole C4), 14.1 (CH<sub>3</sub>) and 10.9 (CH<sub>3</sub>); HRMS calc. for C<sub>9</sub>H<sub>12</sub>N<sub>5</sub>S expected 222.0813; found 222.0802.

**5-Methyl-1-(2-(methylthio)pyrimidin-4-yl)-1H-pyrazol-3-amine (13b)**

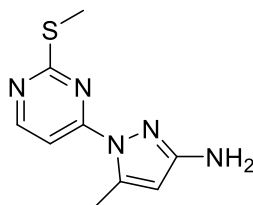

R<sub>f</sub> 0.65 (80% EtOAc/Pet. Ether); mp 116-119 °C; IR ν<sub>max</sub> (solid) 3260 (NH<sub>2</sub>), 2990 – 2900 (CH) cm<sup>-1</sup>; <sup>1</sup>H NMR (600 MHz, CDCl<sub>3</sub>) δ 8.44 (1H, d, *J* = 5.7 Hz, H6), 7.50 (1H, d, *J* = 5.7 Hz, H5), 5.84 (2H, br, NH<sub>2</sub>), 5.33 (1H, s, H12), 2.57 (3H, s, H8) and 2.20 (3H, s, H14); <sup>13</sup>C NMR (150 MHz, CDCl<sub>3</sub>) δ 171.4 (C2), 159.6 (C4), 158.1 (C6), 153.6 (Pyrazole C5), 150.1 (Pyrazole C3), 104.7 (C4), 90.5



(Pyrazole C4), 14.3 (CH<sub>3</sub>) and 14.1 (CH<sub>3</sub>); HRMS calc. for C<sub>9</sub>H<sub>12</sub>N<sub>5</sub>S expected 222.0813; found 222.0815.

**3-Methyl-1-(2-(methylthio)pyrimidin-4-yl)-1H-pyrazole-5-amine (13c)**

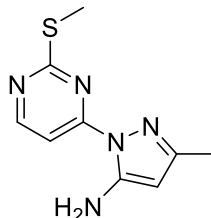

R<sub>f</sub> 0.55 (80% EtOAc/Pet. Ether); mp 102-103 °C; IR ν<sub>max</sub> (solid) 3350 (NH<sub>2</sub>), 2990 - 2920 (CH) cm<sup>-1</sup>; <sup>1</sup>H NMR (600 MHz, *d*<sub>6</sub>-DMSO) δ 8.43 (1H, d, *J* = 5.6 Hz, H6), 7.27 (1H, d, *J* = 5.6 Hz, H5), 5.72 (1H, s, H12), 5.44 (2H, br, NH<sub>2</sub>) and 2.63 (3H, s, H15). H8 signal under DMSO solvent peak. <sup>13</sup>C NMR (150 MHz, *d*<sub>6</sub>-DMSO) δ 170.8 (C2), 158.2 (C6), 157.4 (C4), 157.3 (Pyrazole C3), 142.7 (Pyrazole C5), 104.3 (C5), 101.8 (Pyrazole C4), 15.9 (CH<sub>3</sub>) and 13.8 (CH<sub>3</sub>); LRMS (ES<sup>+</sup>) 222.2 [M+H]<sup>+</sup>; HRMS calc. for C<sub>9</sub>H<sub>12</sub>N<sub>5</sub>S expected 222.0813; found 222.0810.

**2-(Methylthio)pyrimidin-4-amine (13d)**

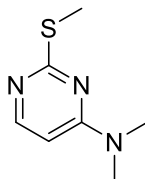

R<sub>f</sub> 0.70 (80% EtOAc/Pet. Ether); IR ν<sub>max</sub> (oil) 3010 - 2920 (CH) cm<sup>-1</sup>; <sup>1</sup>H NMR (500 MHz, CDCl<sub>3</sub>) δ 7.99 (1H, d, *J* = 6.0 Hz, H6), 6.11 (1H, d, *J* = 6.0 Hz, H5), 3.10 (6H, br, H10) and 2.51 (3H, s, H8); <sup>13</sup>C NMR (100 MHz, CDCl<sub>3</sub>) δ 171.1 (C2), 161.5 (C4), 155.3 (C6), 98.3 (C5), 37.0 (NCH<sub>3</sub>) and 14.2 (CH<sub>3</sub>); HRMS calc. for C<sub>7</sub>H<sub>12</sub>N<sub>3</sub>S expected 170.0752; found 170.0755.

***N*-(3-Methyl-1H-pyrazol-5-yl)-2-(methylthio)pyrimidin-4-amine (13a)**

**<sup>1</sup>H NMR**

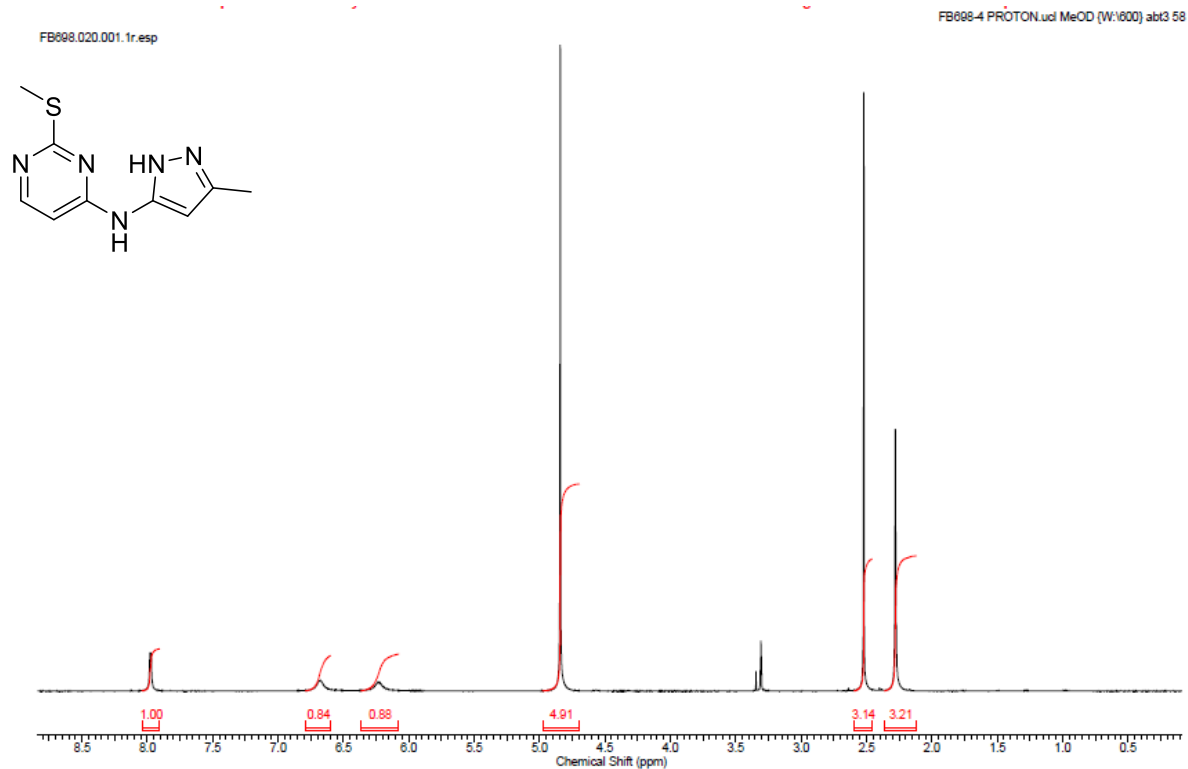

**<sup>13</sup>C NMR**

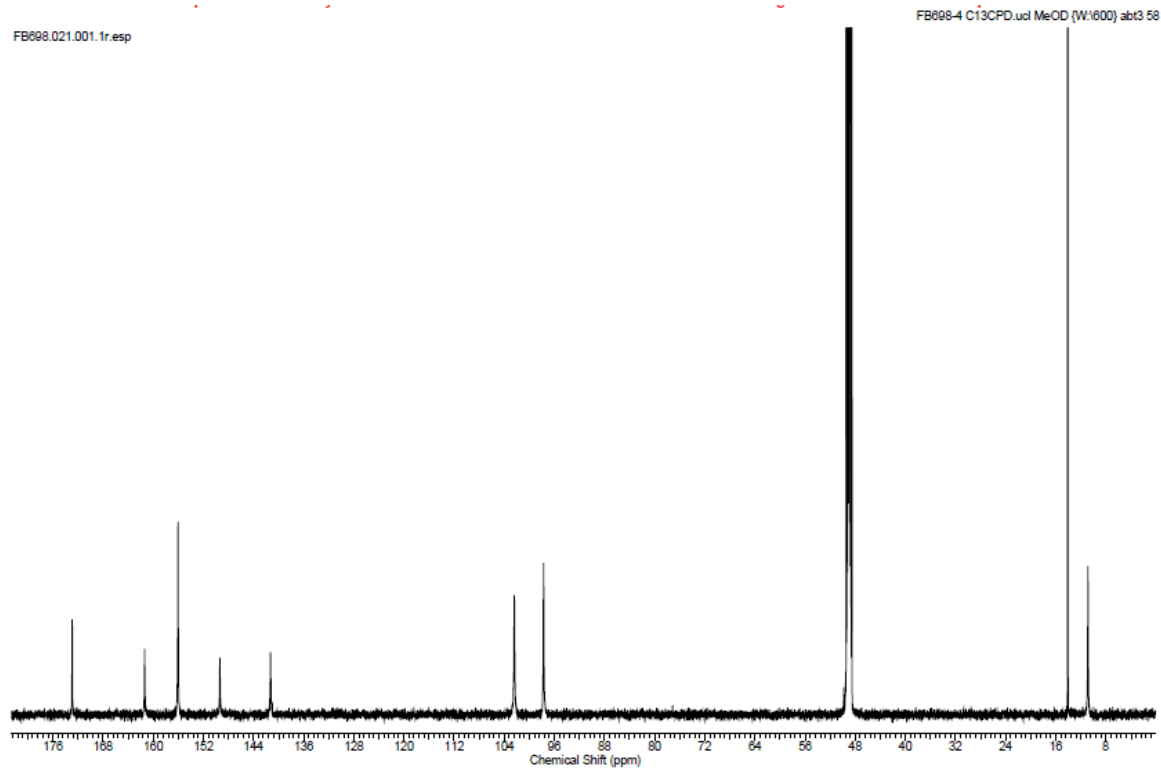

## 5-Methyl-1-(2-(methylthio)pyrimidin-4-yl)-1H-pyrazol-3-amine (13b)

### <sup>1</sup>H NMR

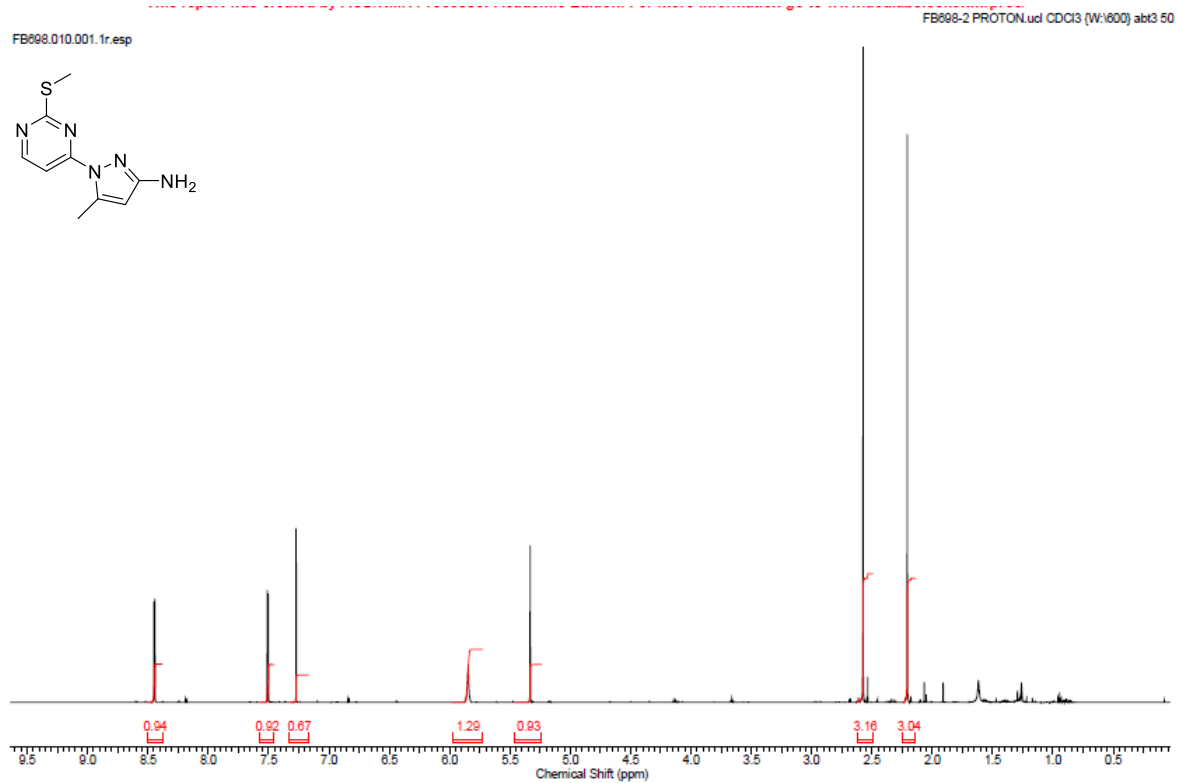

### <sup>13</sup>C NMR

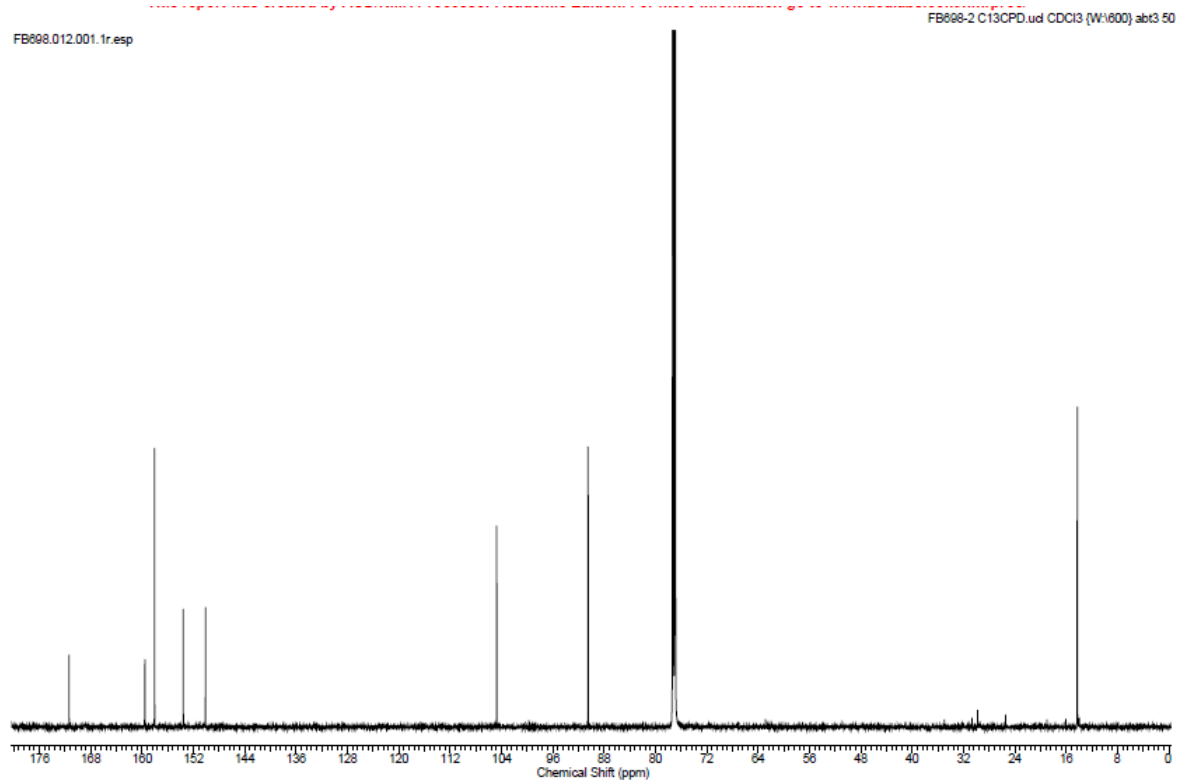

### 3-Methyl-1-(2-(methylthio)pyrimidin-4-yl)-1H-pyrazole-5-amine (13c)

#### <sup>1</sup>H NMR

FB511.010.001.1r.esp

FB511-4 PROTON.ud DMSO (W/Bruker)TOPSPIN) abt3 58

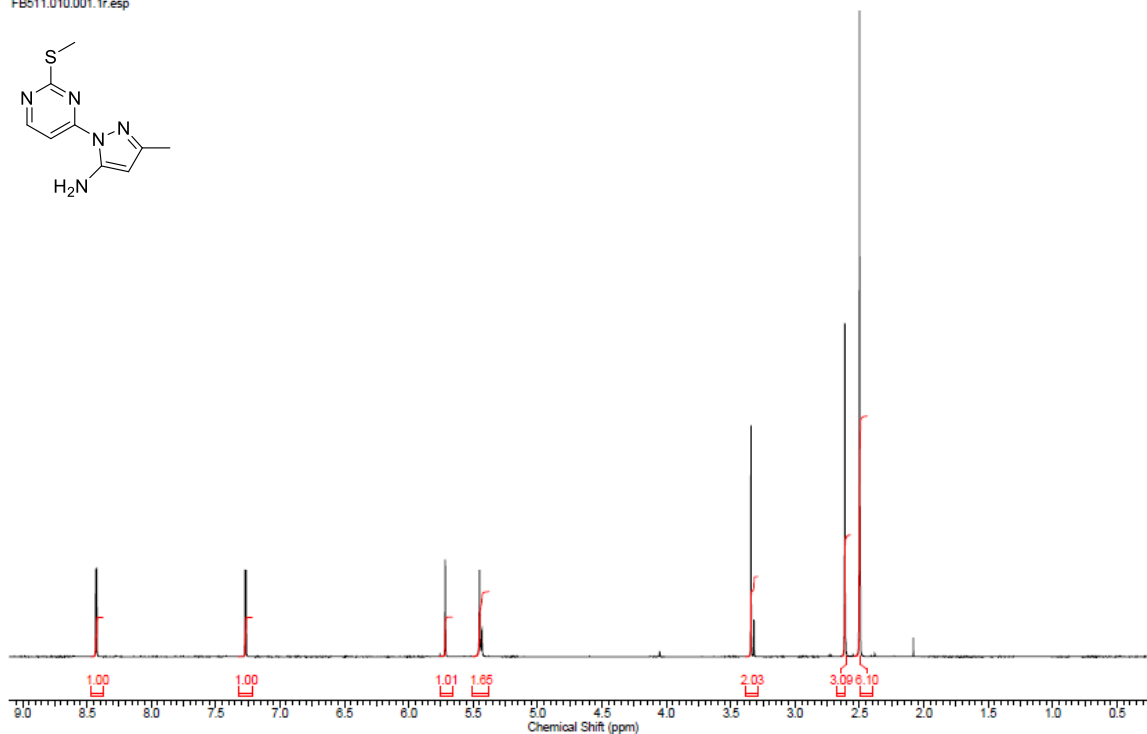

#### <sup>13</sup>C NMR

FB511.012.001.1r.esp

FB511-4 C13CPD.ud DMSO (W/Bruker)TOPSPIN) abt3 58

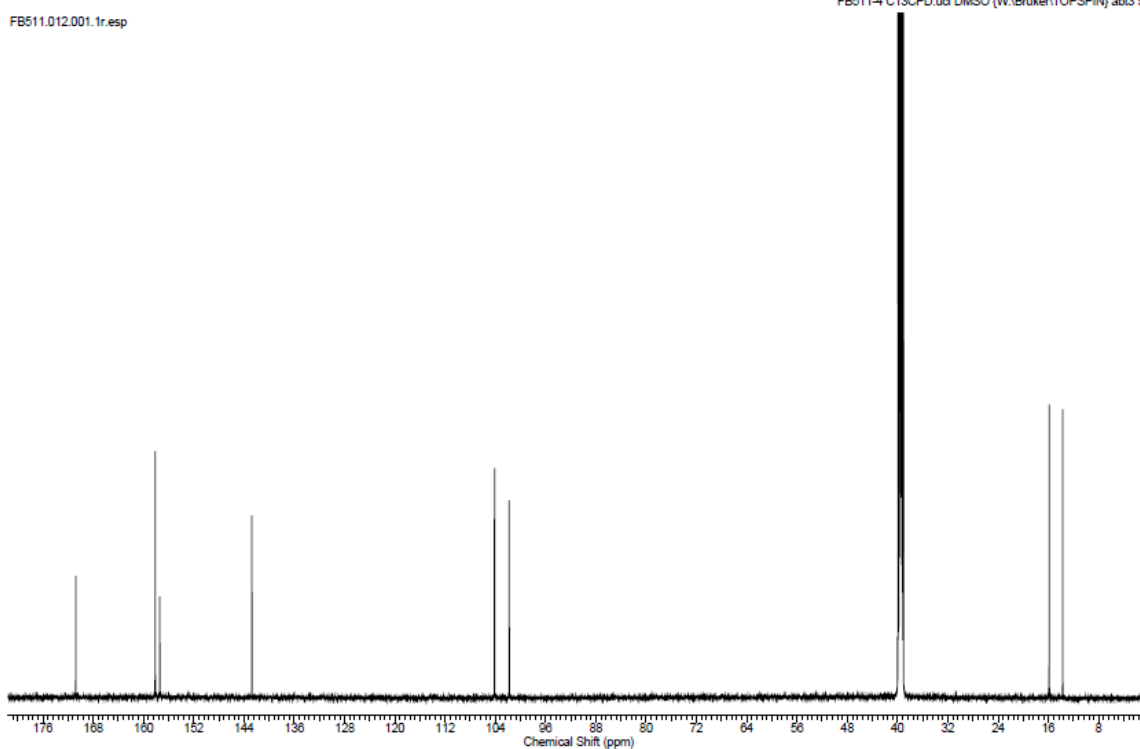

## 2-(Methylthio)pyrimidin-4-amine (13d)

### <sup>1</sup>H NMR

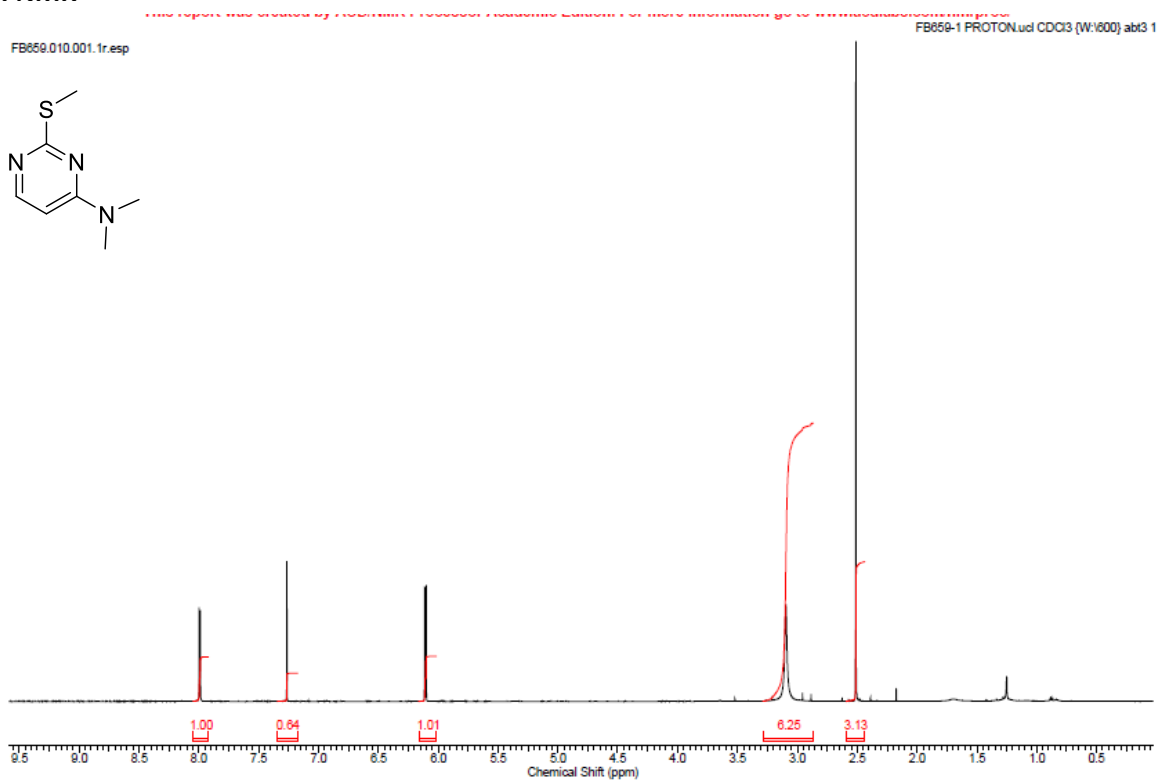

### <sup>13</sup>C NMR

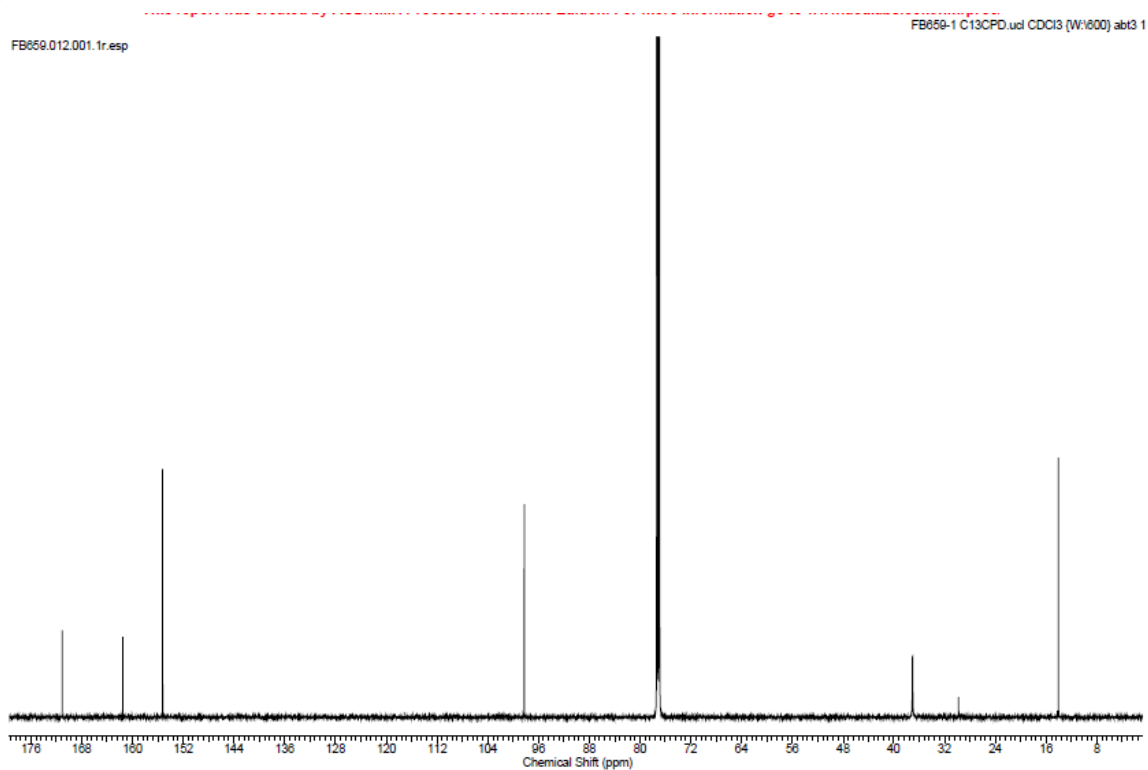

### 3. Design of Experiments Optimisation of S<sub>N</sub>Ar reaction

#### a. Optimisation of the S<sub>N</sub>Ar reaction in DMF

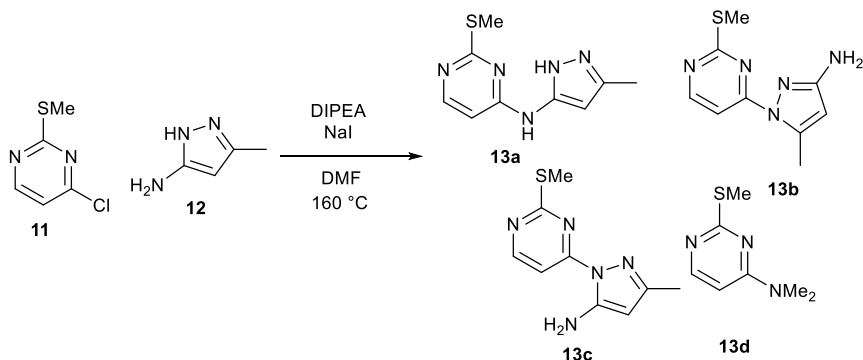

The experimental design was produced using MODDE 10 software as a Resolution V design consisting of 16 experiments plus three centre points as shown below. The yields of all four reaction products **13a-13d**, as well as the quantity of recovered starting material, were determined by <sup>1</sup>H NMR.

| Run Order | Amine eq | NaI eq | DIPEA Eq | DMF vol | Temp |
|-----------|----------|--------|----------|---------|------|
| 1         | 1.25     | 1.05   | 3        | 3.5     | 160  |
| 2         | 0.5      | 2      | 1        | 2       | 120  |
| 3         | 0.5      | 2      | 5        | 5       | 120  |
| 4         | 0.5      | 0.1    | 1        | 5       | 120  |
| 5         | 2        | 2      | 1        | 5       | 120  |
| 6         | 0.5      | 0.1    | 5        | 5       | 200  |
| 7         | 2        | 0.1    | 1        | 5       | 200  |
| 8         | 2        | 2      | 5        | 2       | 120  |
| 9         | 0.5      | 2      | 1        | 5       | 200  |
| 10        | 2        | 2      | 5        | 5       | 200  |
| 11        | 2        | 0.1    | 5        | 2       | 200  |
| 12        | 0.5      | 2      | 5        | 2       | 200  |
| 13        | 1.25     | 1.05   | 3        | 3.5     | 160  |
| 14        | 0.5      | 0.1    | 1        | 2       | 200  |
| 15        | 2        | 0.1    | 5        | 5       | 120  |
| 16        | 0.5      | 0.1    | 5        | 2       | 120  |
| 17        | 1.25     | 1.05   | 3        | 3.5     | 160  |
| 18        | 2        | 2      | 1        | 2       | 200  |
| 19        | 2        | 0.1    | 1        | 2       | 120  |

## Experimental Procedure and Analysis Method

Stock solutions of aryl chloride **11** (1.26 M) and 3-amino-5-methylpyrazole **12** (1.87 M) in DMF and 1,3,5-trimethoxybenzene (0.092 M) in CD<sub>3</sub>OD were prepared.

A mixture of aryl chloride **11** (1.26 M in DMF, 500  $\mu$ L, 0.63 mmol), 3-amino-5-methylpyrazole **12** (1.87 M in DMF, 0.17-0.42 mL), DIPEA (1-3 eq) and sodium iodide (9-189 mg) and DMF (volume shown in table below) was heated in the microwave at the stated temperature for 2 h. The reaction mixture was cooled to RT before concentrating *in vacuo*. The crude reaction residue was dissolved in CD<sub>3</sub>OD (1 mL) and an aliquot (200  $\mu$ L) removed. For NMR analysis, the reaction mixture aliquot was mixed with 1,3,5-trimethoxybenzene solution (0.092 M in CD<sub>3</sub>OD, 500  $\mu$ L).

Conditions and quantities for each reaction are shown in the table below.

| Run Order | 12 (eq) | 12 (mL) | NaI (eq) | NaI (mmol) | NaI (mg) | DIPEA (eq) | DIPEA (mL) | Total DMF (mL) | DMF (mL) | Temp (°C) |
|-----------|---------|---------|----------|------------|----------|------------|------------|----------------|----------|-----------|
| 1         | 1.25    | 0.42    | 1.05     | 0.66       | 99       | 3          | 0.33       | 3.5            | 2.58     | 160       |
| 2         | 0.5     | 0.17    | 2        | 1.26       | 189      | 1          | 0.11       | 2              | 1.33     | 120       |
| 3         | 0.5     | 0.17    | 2        | 1.26       | 189      | 5          | 0.55       | 5              | 4.33     | 120       |
| 4         | 0.5     | 0.17    | 0.1      | 0.06       | 9        | 1          | 0.11       | 5              | 4.33     | 120       |
| 5         | 2       | 0.67    | 2        | 1.26       | 189      | 1          | 0.11       | 5              | 3.83     | 120       |
| 6         | 0.5     | 0.17    | 0.1      | 0.06       | 9        | 5          | 0.55       | 5              | 4.33     | 200       |
| 7         | 2       | 0.67    | 0.1      | 0.06       | 9        | 1          | 0.11       | 5              | 3.83     | 200       |
| 8         | 2       | 0.67    | 2        | 1.26       | 189      | 5          | 0.55       | 2              | 0.83     | 120       |
| 9         | 0.5     | 0.17    | 2        | 1.26       | 189      | 1          | 0.11       | 5              | 4.33     | 200       |
| 10        | 2       | 0.67    | 2        | 1.26       | 189      | 5          | 0.55       | 5              | 3.83     | 200       |
| 11        | 2       | 0.67    | 0.1      | 0.06       | 9        | 5          | 0.55       | 2              | 0.83     | 200       |
| 12        | 0.5     | 0.17    | 2        | 1.26       | 189      | 5          | 0.55       | 2              | 1.33     | 200       |
| 13        | 1.25    | 0.42    | 1.05     | 0.66       | 99       | 3          | 0.33       | 3.5            | 2.58     | 160       |
| 14        | 0.5     | 0.17    | 0.1      | 0.06       | 9        | 1          | 0.11       | 2              | 1.33     | 200       |
| 15        | 2       | 0.67    | 0.1      | 0.06       | 9        | 5          | 0.55       | 5              | 3.83     | 120       |
| 16        | 0.5     | 0.17    | 0.1      | 0.06       | 9        | 5          | 0.55       | 2              | 1.33     | 120       |
| 17        | 1.25    | 0.42    | 1.05     | 0.66       | 99       | 3          | 0.33       | 3.5            | 2.58     | 160       |
| 18        | 2       | 0.67    | 2        | 1.26       | 189      | 1          | 0.11       | 2              | 0.83     | 200       |
| 19        | 2       | 0.67    | 0.1      | 0.06       | 9        | 1          | 0.11       | 2              | 0.83     | 120       |

## Results of the First DoE Experiments

| Run Order | Incl/Excl | Amine |        |          |         |      | %A   | %B   | %C  | %D   | %SM  |
|-----------|-----------|-------|--------|----------|---------|------|------|------|-----|------|------|
|           |           | eq    | NaI eq | DIPEA Eq | DMF vol | Temp |      |      |     |      |      |
| 1         | Incl      | 1.25  | 1.05   | 3        | 3.5     | 160  | 15.3 | 12.4 | 6.2 | 16.4 | 9.5  |
| 2         | Incl      | 0.5   | 2      | 1        | 2       | 120  | 4    | 1.9  | 1   | 0.9  | 46.3 |
| 3         | Incl      | 0.5   | 2      | 5        | 5       | 120  | 3.1  | 1.1  | 0.5 | 1.8  | 18.6 |
| 4         | Incl      | 0.5   | 0.1    | 1        | 5       | 120  | 4.7  | 1.8  | 0.7 | 1.4  | 40.1 |
| 5         | Incl      | 2     | 2      | 1        | 5       | 120  | 8    | 3    | 1.6 | 2.8  | 22   |
| 6         | Incl      | 0.5   | 0.1    | 5        | 5       | 200  | 11.6 | 14.2 | 6.3 | 54.3 | 0    |
| 7         | Incl      | 2     | 0.1    | 1        | 5       | 200  | 11.3 | 8.8  | 4.3 | 59.8 | 0    |
| 8         | Incl      | 2     | 2      | 5        | 2       | 120  | 6.8  | 3.7  | 1.8 | 2.2  | 21.2 |
| 9         | Incl      | 0.5   | 2      | 1        | 5       | 200  | 9.1  | 5.8  | 2.9 | 38.3 | 0    |
| 10        | Incl      | 2     | 2      | 5        | 5       | 200  | 10.9 | 13.5 | 6.9 | 31   | 0    |
| 11        | Incl      | 2     | 0.1    | 5        | 2       | 200  | 16.4 | 18.6 | 8.8 | 43   | 0    |
| 12        | Incl      | 0.5   | 2      | 5        | 2       | 200  | 10.2 | 10.9 | 5.8 | 25.6 | 0    |
| 13        | Incl      | 1.25  | 1.05   | 3        | 3.5     | 160  | 16.4 | 12   | 5.8 | 13.9 | 12   |
| 14        | Incl      | 0.5   | 0.1    | 1        | 2       | 200  | 18.6 | 9.9  | 3.7 | 60.6 | 0    |
| 15        | Incl      | 2     | 0.1    | 5        | 5       | 120  | 8    | 2.9  | 1.1 | 3.3  | 34.3 |
| 16        | Incl      | 0.5   | 0.1    | 5        | 2       | 120  | 10.1 | 1.9  | 0.9 | 2    | 28.3 |
| 17        | Incl      | 1.25  | 1.05   | 3        | 3.5     | 160  | 13.5 | 10.8 | 5.4 | 18.6 | 6.7  |
| 18        | Incl      | 2     | 2      | 1        | 2       | 200  | 12   | 4.3  | 3.1 | 30.5 | 0    |
| 19        | Incl      | 2     | 0.1    | 1        | 2       | 120  | 16.2 | 6.2  | 3.1 | 9.7  | 14.7 |

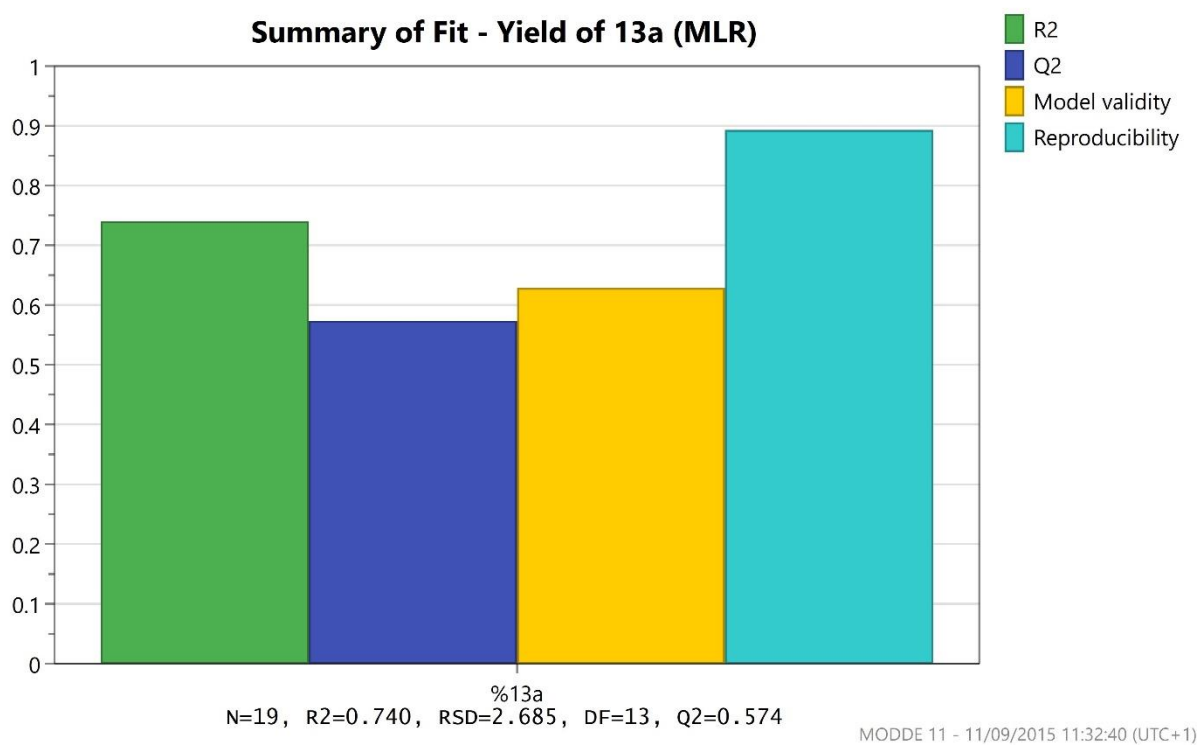



### Coefficients (scaled and centered) - Yield of 13a (MLR)

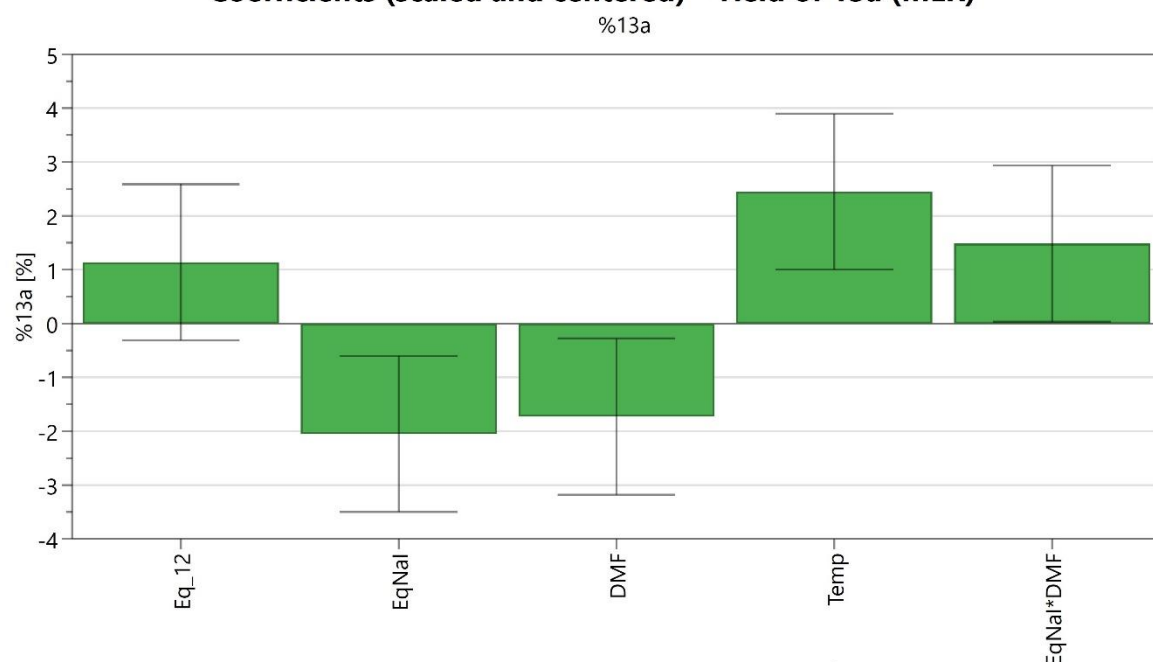

N=19, R<sup>2</sup>=0.740, RSD=2.685, DF=13, Q<sup>2</sup>=0.574, Confidence=0.95

MODDE 11 - 11/09/2015 11:33:07 (UTC+1)

### Summary of Fit - Yield of 13b and 13c (MLR)

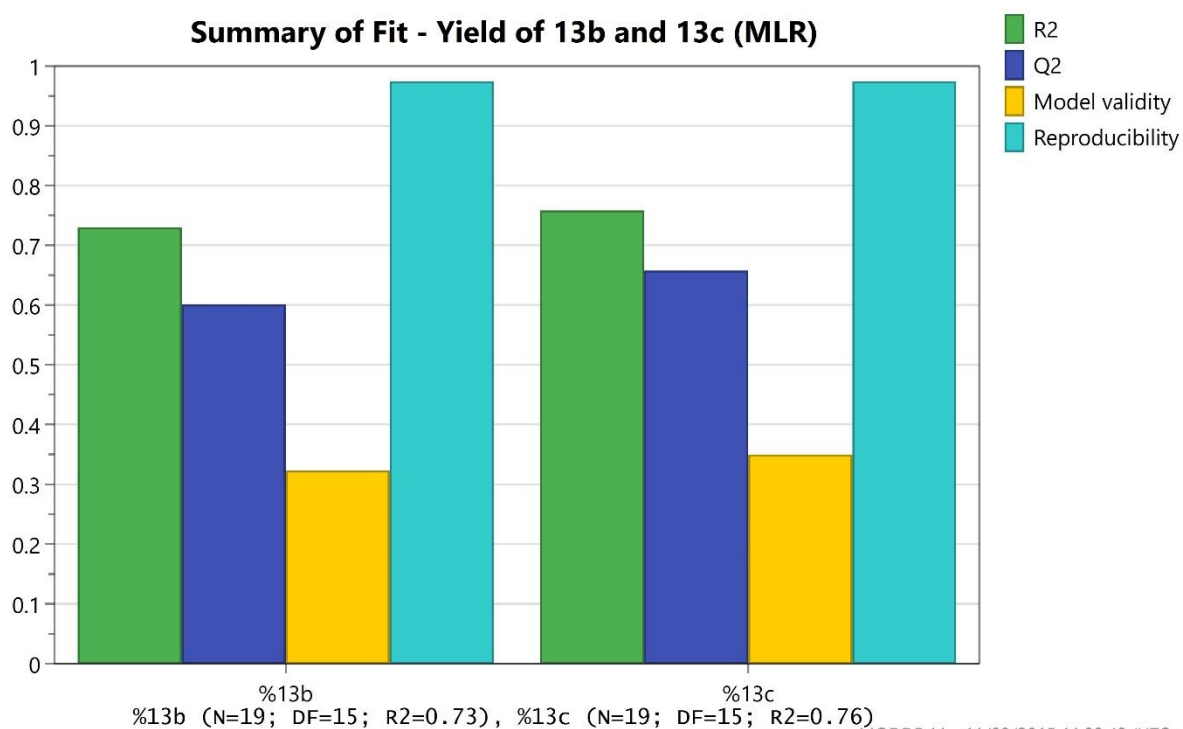

%13b (N=19; DF=15; R<sup>2</sup>=0.73), %13c (N=19; DF=15; R<sup>2</sup>=0.76)

MODDE 11 - 11/09/2015 11:33:43 (UTC+1)

### Coefficients (scaled and centered) - Yield of 13b and 13c (MLR)

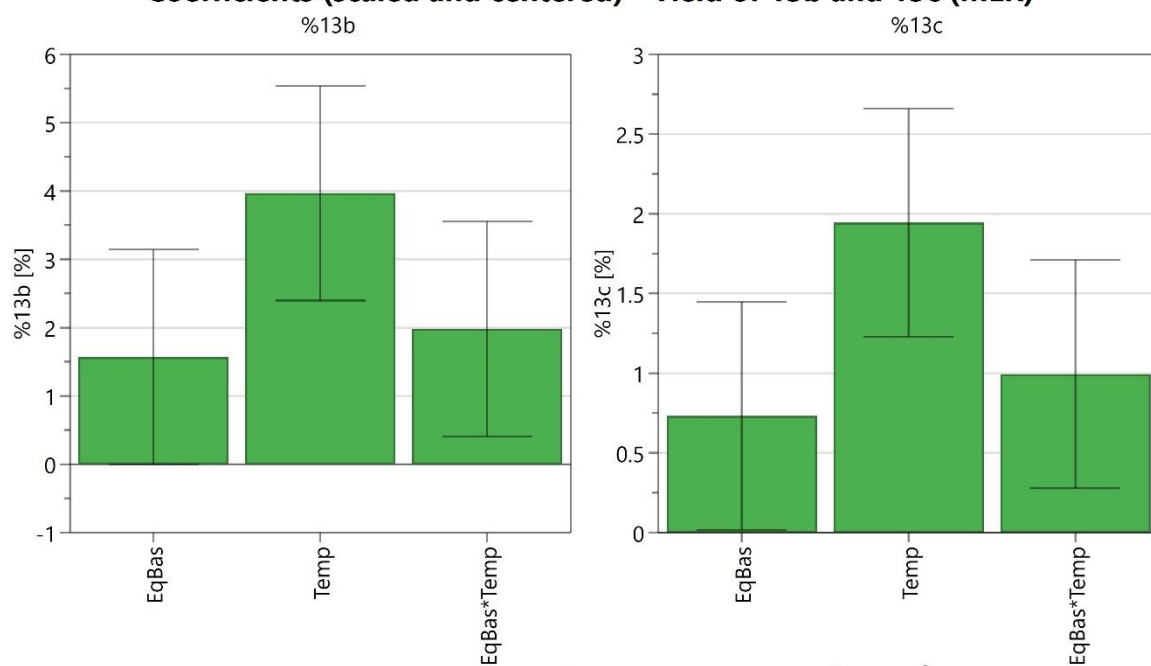

%13b (N=19; DF=15; R2=0.73), %13c (N=19; DF=15; R2=0.76), Confidence=0.95  
MODDE 11 - 11/09/2015 11:34:18 (UTC+1)

### Interaction Plot for EqBas\*Temp - Products 13b/13c (MLR)

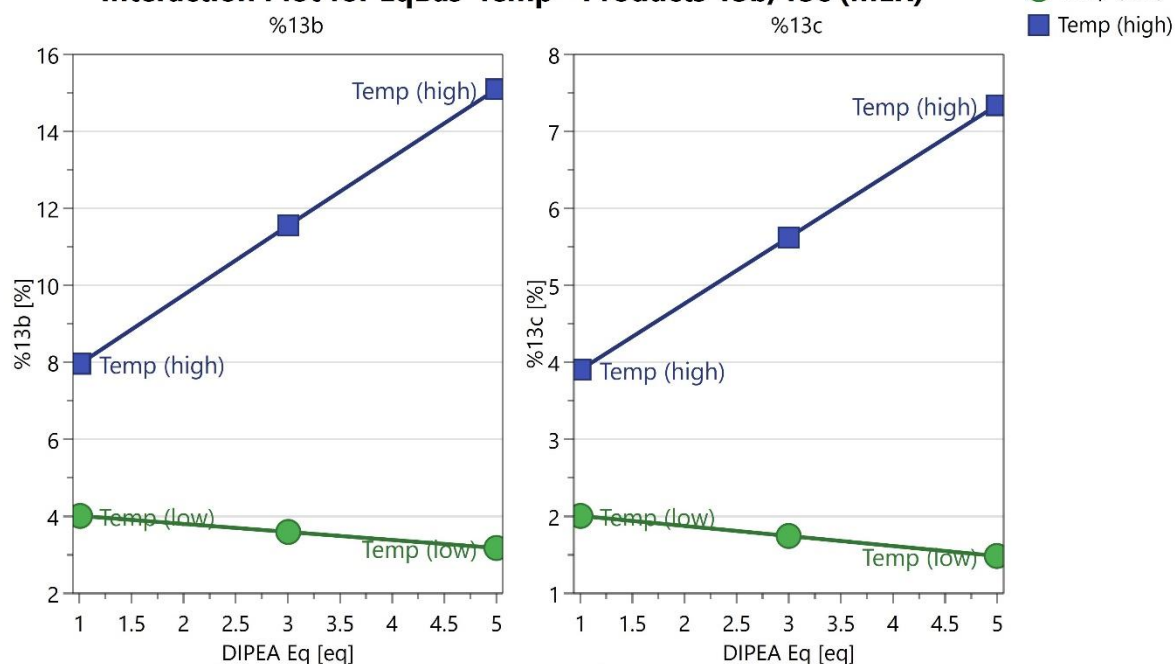

%13b (N=19; DF=15; R2=0.73), %13c (N=19; DF=15; R2=0.76)

MODDE 11 - 11/09/2015 11:34:53 (UTC+1)

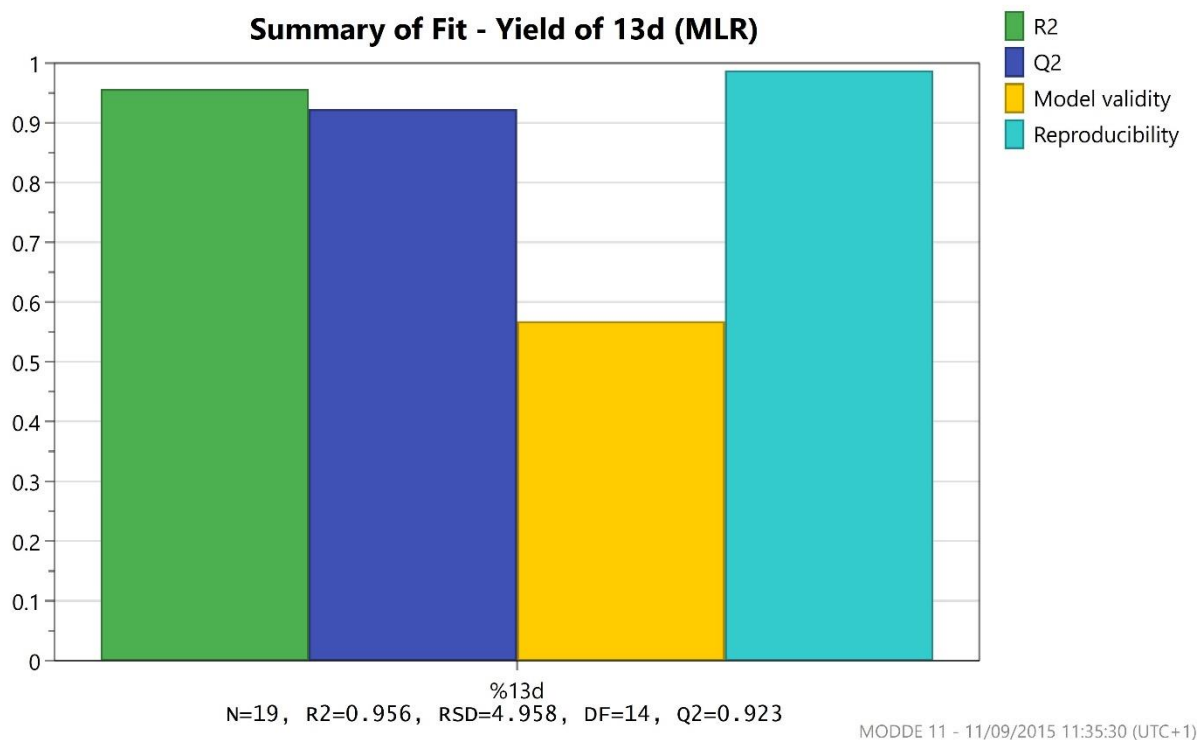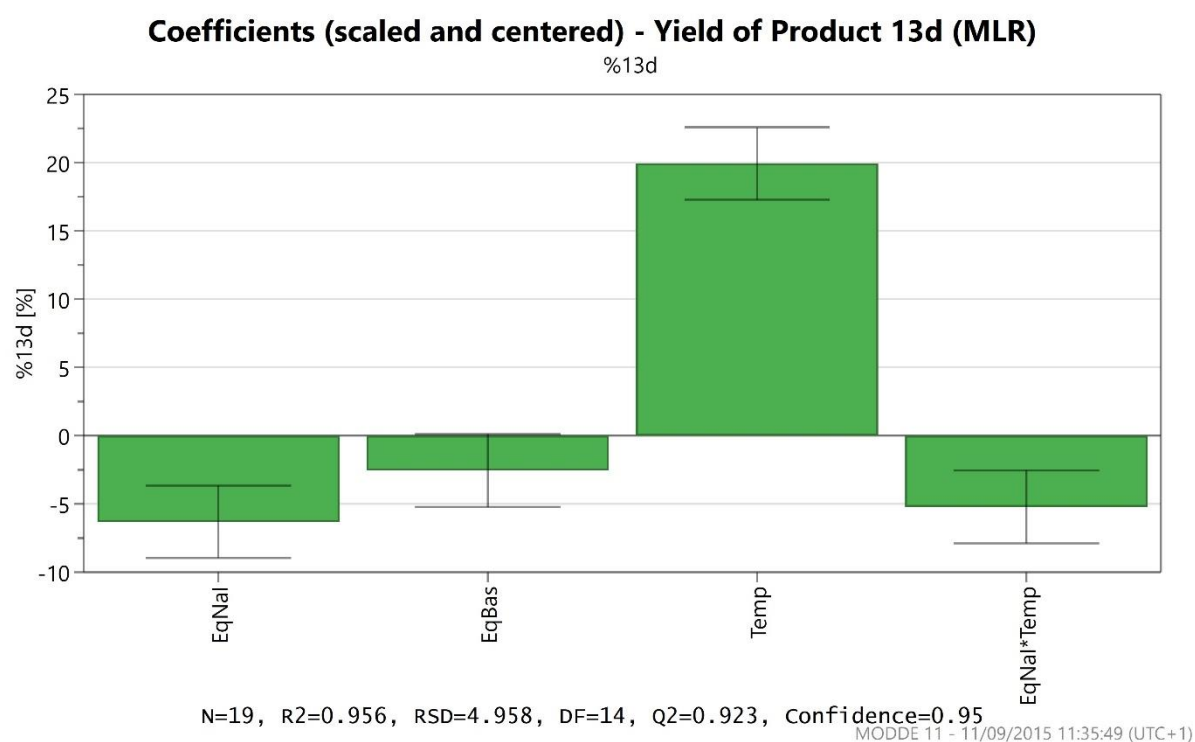

## b. Optimisation of the S<sub>N</sub>Ar reaction by variation of solvent, temperature and concentration

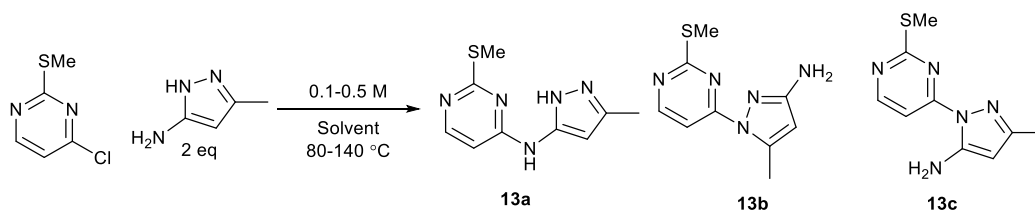

The experimental design was produced using MODDE 10 software as a Resolution IV design consisting of 8 experiments plus three centre points as shown below. The yields of all three reaction products **13a-13c**, as well as the quantity of recovered starting material, were determined by <sup>1</sup>H NMR. The factors investigated were the first two solvent principle components (t1 and t2; -1 to +1 in each case), the temperature (100 to 140 °C) and the concentration (0.1 to 0.5 M)

| Run Order | t1 | t2 | Temp. | Conc. |
|-----------|----|----|-------|-------|
| 1         | 0  | 0  | 120   | 0.3   |
| 2         | 1  | 1  | 140   | 0.1   |
| 3         | 1  | -1 | 140   | 0.5   |
| 4         | -1 | -1 | 140   | 0.1   |
| 5         | -1 | -1 | 100   | 0.5   |
| 6         | 1  | -1 | 100   | 0.1   |
| 7         | -1 | 1  | 140   | 0.5   |
| 8         | 1  | 1  | 100   | 0.5   |
| 9         | 0  | 0  | 120   | 0.3   |
| 10        | 0  | 0  | 120   | 0.3   |
| 11        | -1 | 1  | 100   | 0.1   |

The solvents used for each corner of the design and the centre point are shown below:

|              |               |             |                        |
|--------------|---------------|-------------|------------------------|
|              | <b>t1=-1</b>  |             | <b>t1=+1</b>           |
| <b>t2=+1</b> | <b>DMA</b>    |             | <b>CPME</b>            |
| <b>t2=-1</b> | <b>1-BuOH</b> | <b>EtCN</b> | <b>Pr<sub>2</sub>O</b> |

### Experimental Procedure and Analysis Method

A Stock solution of 1,3,5-trimethoxybenzene (0.28 M) in CH<sub>3</sub>OH was prepared.

A mixture of aryl chloride **11** (1 eq) and 3-amino-5-methylpyrazole **12** (2 eq) in the solvent stated was heated in the microwave at the stated time and temperature. The reaction mixture was cooled to RT before concentrating *in vacuo*. The crude reaction residue was dissolved in CH<sub>3</sub>OH until all the residue was in solution and 1,3,5-trimethoxybenzene (0.28M in CH<sub>3</sub>OH, 500  $\mu$ L) added. An aliquot was removed, concentrated *in vacuo* and then dissolved in CD<sub>3</sub>OD for NMR analysis. Conditions and quantities for each reaction are illustrated in the table below.

| Run Order | Solvent           | Temp (°C) | Conc (M) | Volume (mL) | 11 (mmol) | 11 (mg) | 12 (mmol) | 12 (mg) |
|-----------|-------------------|-----------|----------|-------------|-----------|---------|-----------|---------|
| 1         | EtCN              | 120       | 0.3      | 2           | 0.60      | 96      | 1.20      | 117     |
| 2         | CPME              | 140       | 0.1      | 2           | 0.20      | 32      | 0.40      | 39      |
| 3         | Pr <sub>2</sub> O | 140       | 0.5      | 2           | 1.00      | 160     | 2.00      | 194     |
| 4         | <i>n</i> BuOH     | 140       | 0.1      | 2           | 0.20      | 32      | 0.40      | 39      |
| 5         | <i>n</i> BuOH     | 100       | 0.5      | 2           | 1.00      | 160     | 2.00      | 194     |
| 6         | Pr <sub>2</sub> O | 100       | 0.1      | 2           | 0.20      | 32      | 0.40      | 39      |
| 7         | DMA               | 140       | 0.5      | 2           | 1.00      | 160     | 2.00      | 194     |
| 8         | CPME              | 100       | 0.5      | 2           | 1.00      | 160     | 2.00      | 194     |
| 9         | EtCN              | 120       | 0.3      | 2           | 0.60      | 96      | 1.20      | 117     |
| 10        | EtCN              | 120       | 0.3      | 2           | 0.60      | 96      | 1.20      | 117     |
| 11        | DMA               | 100       | 0.1      | 2           | 0.20      | 32      | 0.40      | 39      |

## Results of the Second DoE Experiments

| Run Order | t1 | t2 | Temp | Conc | %13a | %13b | %13c | %SM  |
|-----------|----|----|------|------|------|------|------|------|
| 1         | 0  | 0  | 120  | 0.3  | 7.2  | 3.2  | 1.1  | 72.6 |
| 2         | 1  | 1  | 140  | 0.1  | 11.3 | 2.2  | 1.2  | 72.9 |
| 3         | 1  | -1 | 140  | 0.5  | 67.6 | 3.6  | 3.3  | 6.7  |
| 4         | -1 | -1 | 140  | 0.1  | 29   | 5.5  | 3.1  | 54.8 |
| 5         | -1 | -1 | 100  | 0.5  | 21.4 | 1.9  | 0.8  | 33.7 |
| 6         | 1  | -1 | 100  | 0.1  | 2.4  | 0    | 0    | 99.3 |
| 7         | -1 | 1  | 140  | 0.5  | 60.5 | 7.1  | 4    | 0*   |
| 8         | 1  | 1  | 100  | 0.5  | 15.9 | 1.4  | 0.7  | 66.5 |
| 9         | 0  | 0  | 120  | 0.3  | 9.4  | 4.3  | 1.5  | 90.9 |
| 10        | 0  | 0  | 120  | 0.3  | 9.1  | 4.1  | 1.5  | 88.5 |
| 11        | -1 | 1  | 100  | 0.1  | 5.9  | 1.1  | 0.7  | 71.3 |

\*23.4% yield of **13d** was also observed in this reaction.

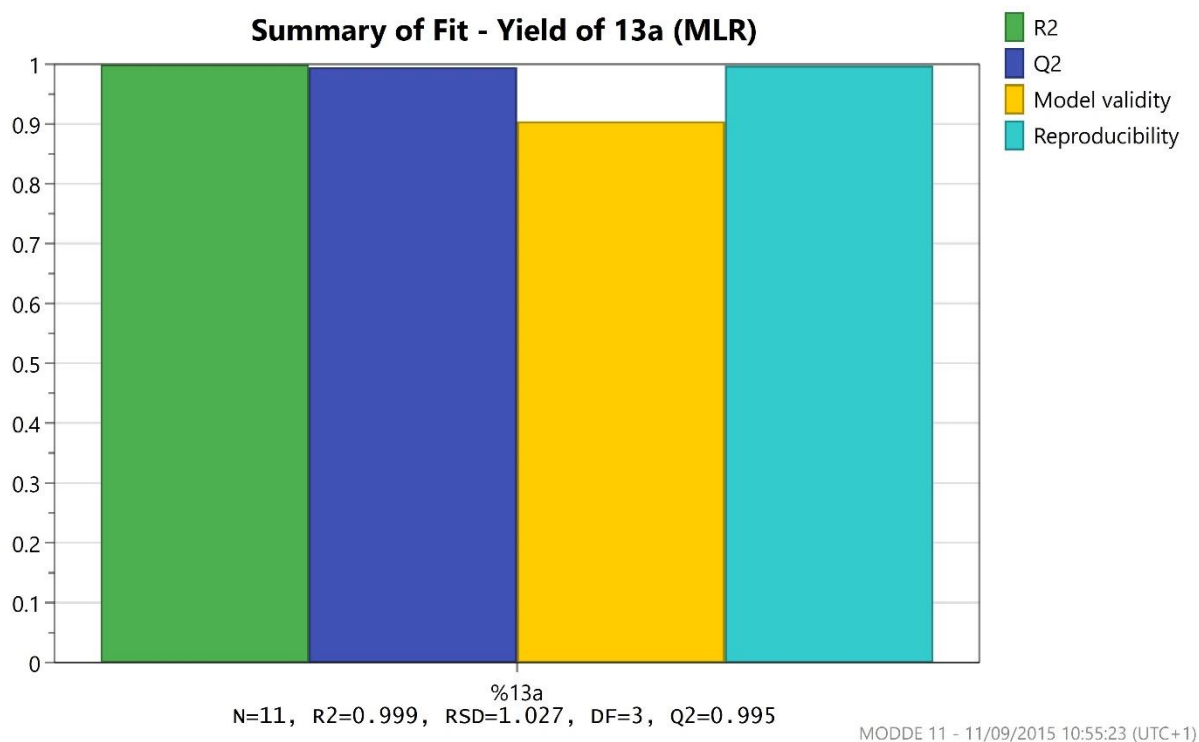

### Coefficients (scaled and centered) - Yield of 13a (MLR)

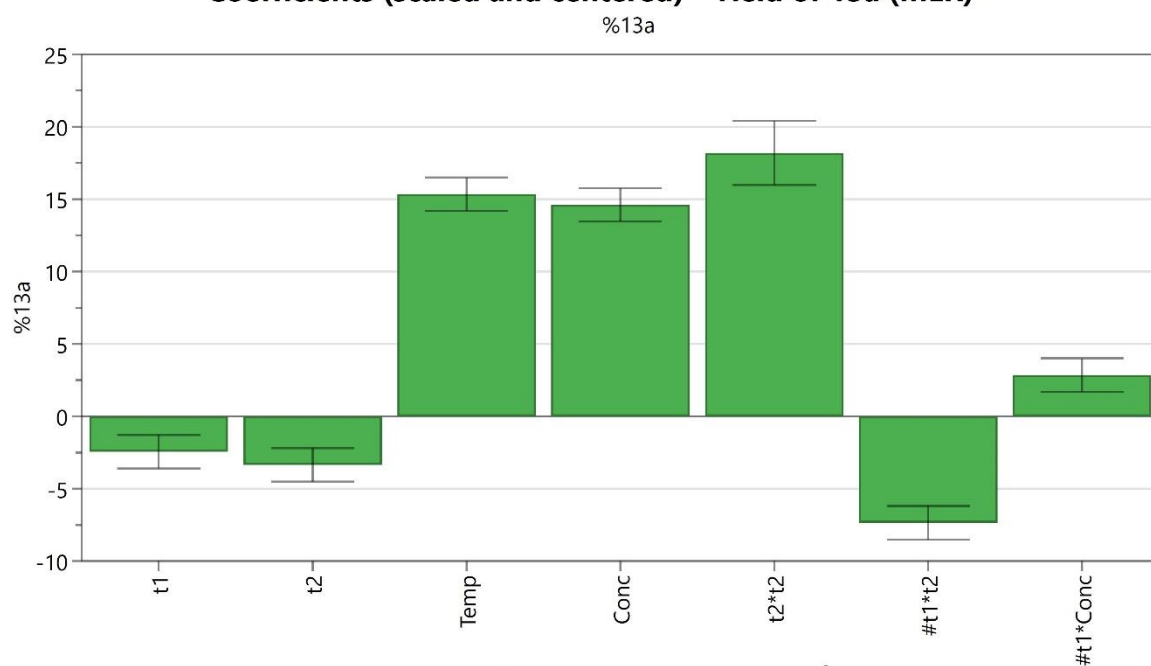

MODDE 11 - 11/09/2015 10:56:18 (UTC+1)

### Interaction Plot for t1\*t2 (MLR)

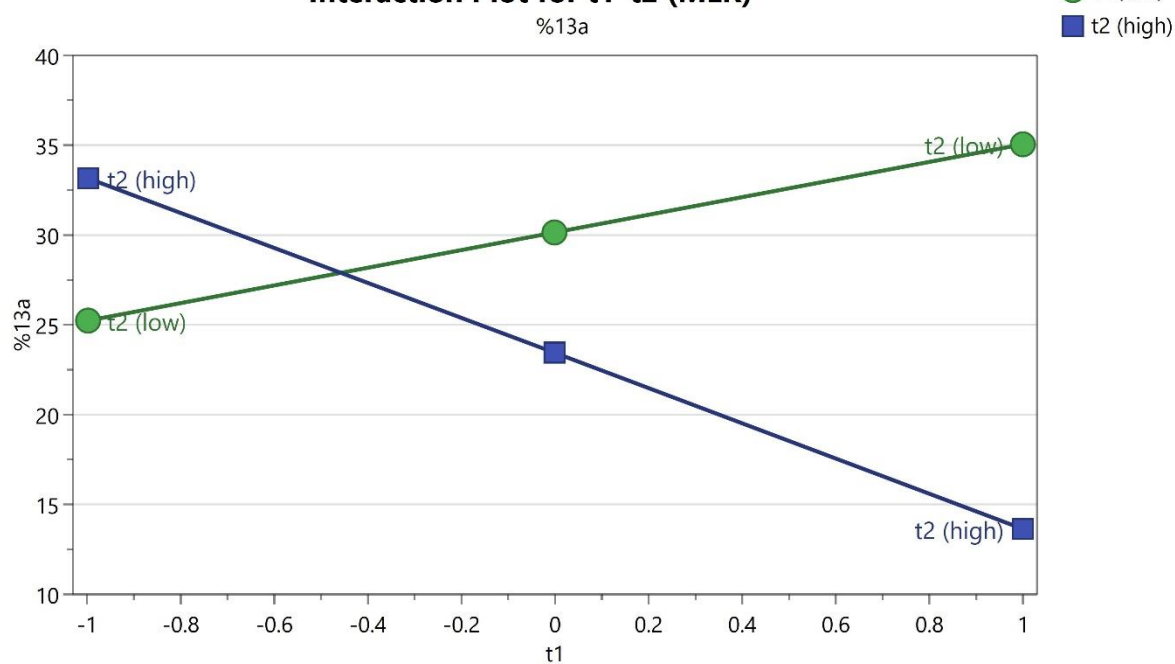

MODDE 11 - 11/09/2015 10:56:51 (UTC+1)

#### 4. Crystallographic Data for 13b and 13c

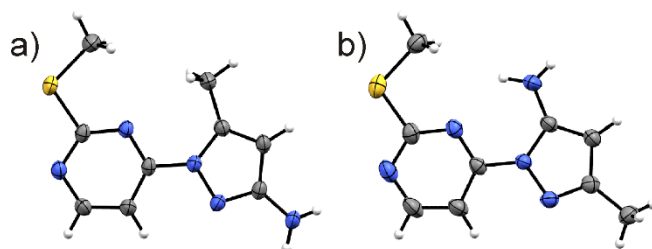

**Figure 8.** Molecular structures of compounds: a) **13b** and b) **13c**, as determined by single crystal X-ray diffraction.

#### Single Crystal X-ray Diffraction

Single X-ray diffraction data was collected using an *Agilent SuperNova (Dual Source)* single crystal X-ray diffractometer equipped with an *Atlas CCD Detector*. The data were collected 150 K (**13b**) and 200 K (**13c**) using  $\text{CuK}\alpha$  radiation ( $\lambda = 1.54184 \text{ \AA}$ ). The data were collected and processed using the *CrysAlisPro* program.<sup>1</sup> Empirical absorption correction was performed using spherical harmonics implemented in the *SCALE3 ABSPACK* scaling algorithm. Structure solution and refinement were accomplished using *SHELXS-97* and *SHELXL-97*, respectively.<sup>2</sup> The structure was solved by direct methods. All non-hydrogen atoms were refined anisotropically, while hydrogen atoms associated with carbon and nitrogen atoms were refined isotropically. Crystallographic and refinement parameters for crystal structures **13b** and **13c** are given in Table S1.

1. CrysAlisPro, Agilent Technologies, Version 1.171.36.28 (release 01-02-2013 CrysAlis171 .NET).  
2. Sheldrick, G. M. *Acta Crystallogr. A* **2008**, *64*, 112–122.

**Table S1.** Crystallographic and refinement parameters for compounds **13b** and **13c**.

| compound                                      | <b>13b</b>                                                       | <b>13c</b>                                                         |
|-----------------------------------------------|------------------------------------------------------------------|--------------------------------------------------------------------|
| empirical formula                             | $\text{C}_9\text{H}_{11}\text{N}_5\text{S}$                      | $\text{C}_9\text{H}_{11}\text{N}_5\text{S}$                        |
| $M_r / \text{g mol}^{-1}$                     | 299.32                                                           | 299.32                                                             |
| $T / \text{K}$                                | 150.00(10)                                                       | 200.00(10)                                                         |
| crystal system                                | monoclinic                                                       | orthorhombic                                                       |
| space group                                   | $P2_1/c$                                                         | $Pca2_1$                                                           |
| $a / \text{\AA}$                              | 7.54390(10)                                                      | 21.0057(3)                                                         |
| $b / \text{\AA}$                              | 23.3450(4)                                                       | 4.06460(10)                                                        |
| $c / \text{\AA}$                              | 5.85840(10)                                                      | 12.0663(2)                                                         |
| $\alpha / ^\circ$                             | 90                                                               | 90                                                                 |
| $\beta / ^\circ$                              | 96.946(2)                                                        | 90                                                                 |
| $\gamma / ^\circ$                             | 90                                                               | 90                                                                 |
| $V / \text{\AA}^3$                            | 1024.16(3)                                                       | 1030.22(3)                                                         |
| $Z$                                           | 4                                                                | 4                                                                  |
| $\rho_{\text{calc}} / \text{g cm}^{-3}$       | 1.435                                                            | 1.427                                                              |
| $\mu / \text{mm}^{-1}$                        | 2.598                                                            | 2.582                                                              |
| $F(000)$                                      | 464                                                              | 464                                                                |
| crystal size / $\text{mm}^3$                  | $0.21 \times 0.14 \times 0.05$                                   | $0.35 \times 0.17 \times 0.06$                                     |
| X-ray radiation                               | $\text{CuK}\alpha$ ( $\lambda = 1.5418 \text{ \AA}$ )            | $\text{CuK}\alpha$ ( $\lambda = 1.5418 \text{ \AA}$ )              |
| index ranges                                  | $-8 \leq h \leq 8$<br>$-27 \leq k \leq 27$<br>$-6 \leq l \leq 6$ | $-26 \leq h \leq 26$<br>$-4 \leq k \leq 4$<br>$-14 \leq l \leq 14$ |
| no. of reflections measured                   | 14217                                                            | 13406                                                              |
| no. independent reflections                   | 1797                                                             | 2040                                                               |
| $R_{\text{int}} [I \geq 2\sigma(I)]$          | 0.0353                                                           | 0.0300                                                             |
| goodness-of-fit on $F^2$                      | 1.046                                                            | 1.063                                                              |
| final $R_1$ values $[I \geq 2\sigma(I)]$      | 0.0314                                                           | 0.0261                                                             |
| final $wR(F^2)$ values $[I \geq 2\sigma(I)]$  | 0.0843                                                           | 0.0674                                                             |
| final $R_1$ values [all data]                 | 0.0339                                                           | 0.0272                                                             |
| final $wR(F^2)$ values [all data]             | 0.0875                                                           | 0.0684                                                             |
| largest diff. peak/hole / $\text{e \AA}^{-3}$ | 0.204 / -0.252                                                   | 0.141 / -0.188                                                     |
| CCDC deposition number                        | 1423525                                                          | 1423524                                                            |



## 5. References

1. C. Körner, P. Starkov, T. D. Sheppard, *J. Am. Chem. Soc.* **2010**, *132*, 5968.
2. C. Brouwer, C. He, *Angew. Chem. Int. Ed.* **2006**, *45*, 1744.
3. A. R. Katritzky, G. Baykut, S. Rachwal, M. Szafran, K. C. Caster and J. Eyler, *J. Chem. Soc., Perkin Trans. 2*, 1989, **10**, 1499 – 1506
4. J Charrier, F. Mazzei, D. Kay and A. Miller, **2004**, *Processes for preparing substituted pyrimidines and pyrimidine derivatives as inhibitors of protein kinase*, WO2004000833
